# Supplementary material for: Deep Sequencing to Reveal Phylo-Geographic Relationships of Juquitiba Virus in Paraguay
Source: MDPI journal article supplement (doi:10.3390/v15091798), 2023-08-24
Supplement: s1 [file s1]

**Table S1A:** Forward (Pools-F) primer sequences and pool designations for JUQV nucleotide sequences

| Pool-F | Name         | Primer Sequence                                    | Region     | Segment |
|--------|--------------|----------------------------------------------------|------------|---------|
| 1F-1   | JUQV_S F1    | TAG TAG TAG ACT CCT TGA GAA GCT ACT ACT GC         | 1-32F      | S       |
| 1F-2   | JUQV_S F687  | CAT AAG TCC TGT MAT GGG AGT CAT TGG ATT C          | 687-717F   | S       |
| 1F-3   | JUQV_S F1370 | GCT TGA GCC AAT CAG TTA YTC ATC TCA GG             | 1370-1398F | S       |
| 1F-4   | JUQV_M F1    | TAG TAG TAG ACT CCG CAA GAA GAA GCA AAA AC         | 1-32F      | M       |
| 1F-5   | JUQV_M F713  | CTG ACC ATC TTA AGA TAA TTA GTA CAT TTG AGG G      | 713-746F   | M       |
| 1F6    | JUQV_M F1324 | CTT TAT CTG CCA GAG GGT CGA CCA AGA TG             | 1324-1352F | M       |
| 1F-7   | JUQV_M F2054 | GGT GAG GTT CCT ATG AAG ACA GAT TTG GAA C          | 2054-2084F | M       |
| 1F-8   | JUQV_M F2679 | GTG ATA TAA TGT CTA CAA CTG CAG GCA TGA GAT G      | 2679-2712F | M       |
| 2F-1   | JUQV_S F262  | CTG GCT ACA AAA CCA GTT GAT CCA ACA GG             | 262-290F   | S       |
| 2F-2   | JUQV_S F910  | GAA TCT GCA ACA YTG TTT ACT GAC ATT GCA AC         | 910-941F   | S       |
| 2F-3   | JUQV_S F1469 | GGT TTA TGG GCC ACT ACT GTT CTT ATT TG             | 1469-1497F | S       |
| 2F-4   | JUQV_M F271  | CTT CAG AAG AGC TAT ACA CAG GTA GAA TGG AG         | 271-302F   | M       |
| 2F-5   | JUQV_M F868  | GTA AGC CGC ATG ATA GTA CAC CCT AGA GG             | 868-898F   | M       |
| 2F-6   | JUQV_M F1592 | GTR TTA ACY TTT TCA TGC TCC CAT TAC ACT AAT GAG TC | 1592-1629F | M       |
| 2F-7   | JUQV_M F2226 | GGA TGG ATG CGA CAT TTA ACA TCA AGA CTG            | 2226-2255F | M       |
| 2F-8   | JUQV_M F2929 | CCG TGA TGT ATC TTT CCA GGA TTT AAG TGA TAA TCC    | 2929-2964F | M       |
| 3F-1   | JUQV_S F454  | CTG TAC ATG CTT TCA ACC CGA GGG                    | 454-477F   | S       |
| 3F-2   | JUQV_S F1228 | CAT TTG GGA GAT GAT ATG GAC CCA GAA CTC AG         | 1228-1259F | S       |
| 3F-3   | JUQV_M F412  | GAC ACA CTC AAG AGG ATT AAG AAG ACA GTG C          | 412-442F   | M       |
| 3F-4   | JUQV_M F1153 | CCA ATT GCA GGT GAG ATG GAA AAG GTC AC             | 1153-1181F | M       |
| 3F-5   | JUQV_M F1770 | GTC CCT ATT GTA TGA CCA TGA CTG AAT CTA CAG        | 1770-1802F | M       |
| 3F-6   | JUQV_M F2531 | CTT GTR ACA CCT TCT GTA AAG GTC TGC A              | 2531-2557F | M       |
| 3F-7   | JUQV_M F3190 | GTG TTG TCA TGA TAC TGA TTG TTC ATC TG             | 3190-3218F | M       |
| 4F-1   | JUQV_S F1    | NAGTAGTAGACTCCTTGAGAAGCTACTACTGC                   | 1-32F      | S       |
| 4F-2   | JUQV_M F1    | TAG TAG TAG ACT CCG CAA GAA GAA GCA AAA AC         | 1-32F      | M       |
| 5F-1   | JUQV_S F910  | GAA TCT GCA ACA YTG TTT ACT GAC ATT GCA AC         | 910-941F   | S       |
| 5F-2   | JUQV_M F2679 | GTG ATA TAA TGT CTA CAA CTG CAG GCA TGA GAT GC     | 2679-2713F | M       |

**Table S1B:** Reverse (Pools-R) primer sequences and pool designations for JUQV nucleotide sequences

| Pool-R | Name         | Primer Sequence                                | Region     | Segment |
|--------|--------------|------------------------------------------------|------------|---------|
| 1R-1   | JUQV_S R534  | GGA TGA GTC ATC TTT AAA CCT GAT CCT AGT CC     | 503-534R   | S       |
| 1R-2   | JUQV_S R1260 | CCT GAG TTC TGG GTC CAT ATC ATC TCC            | 1235-1260R | S       |
| 1R-3   | JUQV_S R1869 | GCA TTA TTG AGG TAG TAT TGT TGA GGT AGT TAA GG | 1835-1869R | S       |
| 1R-4   | JUQV_M R542  | CTA ACC ATA CAG CTT CGT ATT GAC ATA CAT GTG G  | 509-542R   | M       |
| 1R-5   | JUQV_M R1248 | CCA TTC TCA GAA TAT GCT TCA CAA CTT GCT CC     | 1217-1248R | M       |
| 1R-6   | JUQV_M R1853 | GGA ACC TGC CTG TCA ATT TAC AGA TGG C          | 1826-1853R | M       |
| 1R-7   | JUQV_M R2557 | GCA GAC CTT TAC AGA AGG TGT YAC AAG RC         | 2529-2557R | M       |
| 1R-8   | JUQV_M R3275 | CGA TCT GGT TAA AAC CTG TAA CTC GTT CAA GG     | 3244-3275R | M       |
| 2R-1   | JUQV_S R829  | CCT TAT TTG TTG CCA TGA ATG CCT CAG ATG C      | 799-829R   | S       |
| 2R-2   | JUQV_S R1371 | GAT CCT GAG ATG AAT AAC TGA TTG GCT CAA G      | 1371-1401R | S       |
| 2R-3   | JUQV_S R1902 | TAG TAG TAT GCT CCT TGA AAA GCA ATC AAG        | 1873-1902R | S       |
| 2R-4   | JUQV_M R839  | CTA GGT ACA TGC AAT GGT TCT GAA TGA CTT CC     | 808-839R   | M       |
| 2R-5   | JUQV_M R1472 | CCA ATG AAT GGG CAA CAT CAG GCA TC             | 1447-1472R | M       |
| 2R-6   | JUQV_M R2142 | GGC AGG ATT AGT TAA TTT CCG CCT GTA GC         | 2118-2146R | M       |
| 2R-7   | JUQV_M R2813 | CCA TCA TTC TCT TAT ACC CTG ACA CAG TAT TGC    | 2781-2813R | M       |
| 2R-8   | JUQV_M R3443 | GAG GGC ATA GGA GGC TGA ACA AGA TTA TAG        | 3414-3443R | M       |
| 3R-1   | JUQV_S R965  | GCA AAT ACC CAT ACA GAA KGT GGT GTT G          | 938-965R   | S       |
| 3R-2   | JUQV_S R1823 | GGA TGA GGT AGT ATT GTT GTG ATG TTA GTA CAG C  | 1790-1823R | S       |
| 3R-3   | JUQV_M R997  | CTT TCA TAG TGT CTG TTG AAC TAG TAC TAG G      | 966-997R   | M       |
| 3R-4   | JUQV_M R1629 | GAC TCA TTA GTG TAA TGG GAG CAT GAA AAR G      | 1599-1629R | M       |
| 3R-5   | JUQV_M R2222 | GCC CCA ATG GTT GGA TTT CAG CAT GAA TG         | 2194-2222R | M       |
| 3R-6   | JUQV_M R3116 | GTC GAC CCA TAA CAC ATT GCC AAG TCA C          | 3082-3116R | M       |
| 3R-7   | JUQV_M R3674 | TAG TAG TAT GCT CGC AGG AAC AAA ATC C          | 3647-3674R | M       |
| 4R-1   | JUQV_S R965  | GCA AAT ACC CAT ACA GAA KGT GGT GTT G          | 938-965R   | S       |
| 4R-2   | JUQV_M R1004 | GCA GTT CCT TTC ATA GTG TCT GTT GAA CTA G      | 974-1004R  | M       |
| 5R-1   | JUQV_S R1904 | TAG TAG TAT GCT CCT TGA AAA GCA ATC AAG        | 1875-1904R | S       |
| 5R-2   | JUQV_M R3674 | TAG TAG TAT GCT CGC AGG AAC AAA ATC C          | 3647-3674R | M       |

**Table S2.** S segment hantavirus reference sequences.

| <b>Hantavirus</b>       | <b>Genbank<br/>Accession<br/>Codes</b> | <b>Country</b> | <b>Collection<br/>Year</b> | <b>Reference</b> |
|-------------------------|----------------------------------------|----------------|----------------------------|------------------|
| Sin nombre              | L37904                                 | USA            | 1993                       | PMID: 7494336    |
| Juquitiba               | KC422344                               | Brazil         | 2005                       | PMID: 23751399   |
| Juquitiba               | KC422345                               | Brazil         | 2005                       | PMID: 23751399   |
| Juquitiba               | KC422346                               | Brazil         | 2005                       | PMID: 23751399   |
| Juquitiba               | KC422347                               | Brazil         | 2004                       | PMID: 23751399   |
| Juquitiba               | KC422348                               | Brazil         | 2008                       | PMID: 23751399   |
| Juquitiba               | KY053844                               | Brazil         | 2015                       | Unpublished      |
| Juquitiba               | MF405146                               | Brazil         | 2006                       | PMID: 28856421   |
| Juquitiba               | KF913850                               | Brazil         | 2008                       | Unpublished      |
| Juquitiba               | KF913849                               | Brazil         | 2008                       | Unpublished      |
| Juquitiba               | JX173798                               | Brazil         | 2011                       | Unpublished      |
| Araucaria               | AY740630                               | Brazil         | 2003                       | PMID: 15977228   |
| Araucaria               | AY740624                               | Brazil         | 2002                       | PMID: 15977228   |
| Araucaria               | AY740633                               | Brazil         | 2003                       | PMID: 15977228   |
| Itapua 38               | DQ345766                               | Paraguay       | 1998                       | PMID: 17172380   |
| Itapua 37               | DQ345765                               | Paraguay       | 1998                       | PMID: 17172380   |
| Andes                   | AY228237                               | Chile          | 1999                       | PMID: 14513715   |
| Andes                   | MT956622                               | Chile          | 1997                       | Unpublished      |
| Bermejo                 | AF482713                               | Argentina      | 1997                       | PMID: 11907216   |
| Neembucu                | DQ345763                               | Paraguay       | 1997                       | PMID: 17172380   |
| Lechiguanas             | AF482714                               | Argentina      | 1997                       | PMID: 11907216   |
| Oran                    | AF482715                               | Argentina      | 1997                       | PMID: 11907216   |
| Araraquara<br>P5/Cajuru | EF571895                               | Brazil         | Unknown                    | PMID: 19001829   |
| Paranoa                 | EF576661                               | Brazil         | 2004                       | PMID: 19103306   |
| Maciel                  | AF482716                               | Argentina      | 1997                       | PMID: 11907216   |
| Pergamino               | AF482717                               | Argentina      | 1997                       | PMID: 11907216   |
| Tunari                  | JF750419                               | Bolivia        | 2008                       | PMID: 22515983   |
| Rio Mamore              | FJ532244                               | Peru           | 1996                       | PMID: 20687859   |
| Rio Mamore              | U52136                                 | Bolivia        | 1985                       | PMID: 9311652    |
| Anajatuba               | JX443690                               | Brazil         | 2009                       | PMID: 23055565   |
| Jabora                  | JN232078                               | Brazil         | 2006                       | PMID: 22510841   |
| Necocli                 | NC043409                               | Colombia       | 2011                       | PMID: 26186516   |
| Laguna Negra            | AF005727                               | Paraguay       | 1995                       | PMID: 9375015    |

**Table S3.** Reciprocal IFA Titers

| Species                      | TK       | Collection Site | Collection Date | IFA Titer |
|------------------------------|----------|-----------------|-----------------|-----------|
| <i>Oligoryzomys nigripes</i> | TK186690 | Itapúa          | 02/25/2019      | 1:128     |
| <i>Oligoryzomys nigripes</i> | TK186704 | Itapúa          | 02/26/2019      | 1:256     |
| <i>Oligoryzomys nigripes</i> | TK206269 | Itapúa          | 26/26/2019      | 1:8192    |

**Table S4.** Summary of reads, sequencing depths and coverage for the S and M-segments from selected lung samples.

| Sample   | S-Segment   |                  |              | M-Segment   |                  |              |
|----------|-------------|------------------|--------------|-------------|------------------|--------------|
|          | Total Reads | Average Coverage | Coverage (%) | Total Reads | Average Coverage | Coverage (%) |
| TK186690 | 107,912     | 7,680            | 100          | 225,868     | 8,622.91         | 100          |
| TK206269 | 75,879      | 6,668.96         | 99           | 212,025     | 10,665           | 100          |
| TK206284 | 1018        | 57.73            | 100          | 1656        | 42.89            | 95           |
| TK186704 | 616         | 29.31            | 75           | 203         | 4.58             | 84           |
| TK186673 | 512         | 18.74            | 77           | 1271        | 22.87            | 87           |

**Table S5.** Sample numbers and GenBank accession numbers used for phylogenetic and phylogeographic analyses of S and M segments.

| Department | Sample   | GenBank Accession Numbers |           |
|------------|----------|---------------------------|-----------|
|            |          | S Segment                 | M Segment |
| Itapúa     | TK186690 | OR184117                  | OR184122  |
|            | TK206269 | OR184118                  | OR184123  |
|            | TK184992 | OR184959                  | OR184986  |
|            | TK66695  | OR184961                  | OR184976  |
|            | TK132709 | OR184962                  | OR184978  |
|            | TK133245 | OR184963                  | OR184979  |
|            | TK141638 | OR184964                  | OR184980  |
|            | TK141660 | OR184965                  | OR184981  |
|            | TK141672 | OR184966                  | OR184982  |
|            | TK141765 | OR184967                  | OR184983  |
| Canindeyú  | TK184858 | OR184968                  | OR184984  |
|            | TK186283 | OR184969                  | OR184987  |
|            | TK186318 | OR184970                  | OR184988  |
|            | TK186352 | OR184971                  | OR184989  |
|            | TK186353 | OR184972                  | OR184990  |
|            | TK246023 | OR184973                  | OR184991  |
|            | TK246099 | OR184974                  | OR184992  |
|            | TK184889 | OR184975                  | OR184985  |
|            | TK66745  | OR184691                  | OR184977  |
