# Supplementary material for: Deep Sequencing to Reveal Phylo-Geographic Relationships of Juquitiba Virus in Paraguay
Source: Viruses. 2023 Aug 24;15(9):1798. doi: 10.3390/v15091798 (PMC10537311; doi:10.3390/v15091798)
Supplement: Supplementary file 1 [file viruses-15-01798-s001.zip › Itapua and Chaco, 2019 Database.xlsx]

## Sheet: Sheet1
TK	Date	Sero status	RNA	Status	Genus	Specie	Species	Age	Year	Sex	Repr. Cond.	Weight	Department	Release	Order	Family	Subfamily	Collect_Point or Line
186587	2019-02-22	0	0	0	Akodon	montensis	Akodon montensis	3	2019	2	4	37	Itapua	3	Rodentia	Cricetidae	Sigmodontinae	A
186588	2019-02-22	0	0	0	Oligoryzomys	flavescens	Oligoryzomys flavescens	2	2019	1	2	12	Itapua	3	Rodentia	Cricetidae	Sigmodontinae	A
186589	2019-02-22	0	0	0	Akodon	montensis	Akodon montensis	3	2019	2	3	27	Itapua	3	Rodentia	Cricetidae	Sigmodontinae	A
186590	2019-02-22	0	0	0	Akodon	montensis	Akodon montensis	3	2019	2	3	23	Itapua	3	Rodentia	Cricetidae	Sigmodontinae	A
186591	2019-02-22	0	0	0	Akodon	montensis	Akodon montensis	3	2019	2	5	42	Itapua	3	Rodentia	Cricetidae	Sigmodontinae	B
186592	2019-02-22	0	0	0	Akodon	montensis	Akodon montensis	3	2019	2	3	18	Itapua	3	Rodentia	Cricetidae	Sigmodontinae	D
186593	2019-02-22	0	0	0	Akodon	montensis	Akodon montensis	2	2019	2	3	23	Itapua	3	Rodentia	Cricetidae	Sigmodontinae	D
186594	2019-02-22	0	0	0	Akodon	montensis	Akodon montensis	3	2019	2	5	35	Itapua	3	Rodentia	Cricetidae	Sigmodontinae	B
186595	2019-02-22	0	0	0	Akodon	montensis	Akodon montensis	2	2019	2	3	12	Itapua	3	Rodentia	Cricetidae	Sigmodontinae	C
186596	2019-02-22	0	0	0	Akodon	azarae	Akodon azarae	3	2019	1	2	17	Itapua	3	Rodentia	Cricetidae	Sigmodontinae	C
186597	2019-02-22	0	0	0	Akodon	azarae	Akodon azarae	3	2019	2	3	16	Itapua	3	Rodentia	Cricetidae	Sigmodontinae	C
186598	2019-02-22	0	0	0	Akodon	montensis	Akodon montensis	3	2019	2	3	35	Itapua	3	Rodentia	Cricetidae	Sigmodontinae	C
186599	2019-02-22	0	0	0	Oligoryzomys	nigripes	Oligoryzomys nigripes	3	2019	1	2	19	Itapua	3	Rodentia	Cricetidae	Sigmodontinae	C
186600	2019-02-22	0	0	0	Akodon	montensis	Akodon montensis	3	2019	2	5	41	Itapua	3	Rodentia	Cricetidae	Sigmodontinae	C
186601	2019-02-22	0	0	0	Akodon	montensis	Akodon montensis	3	2019	2	3	33	Itapua	3	Rodentia	Cricetidae	Sigmodontinae	C
186602	2019-02-22	0	0	0	Akodon	azarae	Akodon azarae	2	2019	2	3	10	Itapua	3	Rodentia	Cricetidae	Sigmodontinae	B
186603	2019-02-22	0	0	0	Akodon	azarae	Akodon azarae	3	2019	2	3	19	Itapua	3	Rodentia	Cricetidae	Sigmodontinae	C
186604	2019-02-22	0	0	0	Akodon	montensis	Akodon montensis	3	2019	2	5	27	Itapua	3	Rodentia	Cricetidae	Sigmodontinae	C
186605	2019-02-22	0	0	0	Akodon	montensis	Akodon montensis	2	2019	1	2	18	Itapua	3	Rodentia	Cricetidae	Sigmodontinae	D
186606	2019-02-22	0	0	0	Thaptomys	nigrita	Thaptomys nigrita	2	2019	2	3	11	Itapua	3	Rodentia	Cricetidae	Sigmodontinae	D
186607	2019-02-22	0	0	0	Thaptomys	nigrita	Thaptomys nigrita	2	2019	1	2	12	Itapua	3	Rodentia	Cricetidae	Sigmodontinae	D
186608	2019-02-22	0	0	0	Akodon	azarae	Akodon azarae	3	2019	2	3	24	Itapua	3	Rodentia	Cricetidae	Sigmodontinae	D
186609	2019-02-23	0	0	0	Akodon	montensis	Akodon montensis	3	2019	2	4	40	Itapua	3	Rodentia	Cricetidae	Sigmodontinae	E
186610	2019-02-23	0	0	0	Akodon	azarae	Akodon azarae	3	2019	1	2	28	Itapua	3	Rodentia	Cricetidae	Sigmodontinae	E
186611	2019-02-23	0	0	0	Akodon	azarae	Akodon azarae	3	2019	2	3	25	Itapua	3	Rodentia	Cricetidae	Sigmodontinae	A
186612	2019-02-23	0	0	0	Akodon	azarae	Akodon azarae	3	2019	2	3	15	Itapua	3	Rodentia	Cricetidae	Sigmodontinae	A
186613	2019-02-23	0	0	0	Akodon	montensis	Akodon montensis	3	2019	1	2	22	Itapua	3	Rodentia	Cricetidae	Sigmodontinae	C
186614	2019-02-23	0	0	0	Akodon	montensis	Akodon montensis	3	2019	1	2	28	Itapua	3	Rodentia	Cricetidae	Sigmodontinae	C
186615	2019-02-23	0	0	0	Akodon	montensis	Akodon montensis	3	2019	1	1	37	Itapua	3	Rodentia	Cricetidae	Sigmodontinae	C
186616	2019-02-23	0	0	0	Akodon	montensis	Akodon montensis	3	2019	1	1	43	Itapua	3	Rodentia	Cricetidae	Sigmodontinae	C
186617	2019-02-23	0	0	0	Oligoryzomys	nigripes	Oligoryzomys nigripes	3	2019	1	1	23	Itapua	3	Rodentia	Cricetidae	Sigmodontinae	C
186618	2019-02-23	0	0	0	Akodon	montensis	Akodon montensis	3	2019	2	5	33	Itapua	3	Rodentia	Cricetidae	Sigmodontinae	C
186619	2019-02-23	0	0	0	Akodon	montensis	Akodon montensis	3	2019	1	2	21	Itapua	3	Rodentia	Cricetidae	Sigmodontinae	D
186620	2019-02-23	0	0	0	Oligoryzomys	mattogrossae	Oligoryzomys mattogrossae	2	2019	1	2	8	Itapua	3	Rodentia	Cricetidae	Sigmodontinae	D
186621	2019-02-23	0	0	0	Thaptomys	nigrita	Thaptomys nigrita	3	2019	2	6	17	Itapua	3	Rodentia	Cricetidae	Sigmodontinae	D
186622	2019-02-23	0	0	0	Akodon	azarae	Akodon azarae	2	2019	1	2	14	Itapua	3	Rodentia	Cricetidae	Sigmodontinae	D
186623	2019-02-23	0	0	0	Akodon	montensis	Akodon montensis	3	2019	2	4	45	Itapua	3	Rodentia	Cricetidae	Sigmodontinae	D
186624	2019-02-23	0	0	0	Sooretamys	angouya	Sooretamys angouya	3	2019	2	3	73	Itapua	3	Rodentia	Cricetidae	Sigmodontinae	B
186625	2019-02-23	0	0	0	Akodon	montensis	Akodon montensis	2	2019	1	2	9	Itapua	3	Rodentia	Cricetidae	Sigmodontinae	D
186626	2019-02-23	0	0	0	Akodon	azarae	Akodon azarae	2	2019	1	2	10	Itapua	3	Rodentia	Cricetidae	Sigmodontinae	B
186627	2019-02-23	0	0	0	Akodon	montensis	Akodon montensis	3	2019	2	4	43	Itapua	3	Rodentia	Cricetidae	Sigmodontinae	B
186628	2019-02-24	0	0	0	Akodon	azarae	Akodon azarae	3	2019	1	2		Itapua	3	Rodentia	Cricetidae	Sigmodontinae	A
186629	2019-02-24	0	0	0	Akodon	azarae	Akodon azarae	2	2019	1	2	10	Itapua	3	Rodentia	Cricetidae	Sigmodontinae	B
186630	2019-02-24	0	0	0	Akodon	azarae	Akodon azarae	3	2019	2	3	29	Itapua	3	Rodentia	Cricetidae	Sigmodontinae	B
186631	2019-02-24	0	0	0	Akodon	azarae	Akodon azarae	3	2019	2	3	23	Itapua	3	Rodentia	Cricetidae	Sigmodontinae	B
186632	2019-02-24	0	0	0	Akodon	azarae	Akodon azarae	2	2019	1	2	16	Itapua	3	Rodentia	Cricetidae	Sigmodontinae	B
186633	2019-02-24	0	0	0	Akodon	azarae	Akodon azarae	1	2019	2	3	8	Itapua	3	Rodentia	Cricetidae	Sigmodontinae	B
186634	2019-02-24	0	0	0	Akodon	azarae	Akodon azarae	3	2019	1	2	15	Itapua	3	Rodentia	Cricetidae	Sigmodontinae	B
186635	2019-02-24	0	0	0	Akodon	azarae	Akodon azarae	3	2019	1	2	24	Itapua	3	Rodentia	Cricetidae	Sigmodontinae	B
186636	2019-02-24	0	0	0	Akodon	montensis	Akodon montensis	3	2019	1	2	26	Itapua	3	Rodentia	Cricetidae	Sigmodontinae	D
186637	2019-02-24	0	0	0	Akodon	montensis	Akodon montensis	3	2019	2	3	22	Itapua	3	Rodentia	Cricetidae	Sigmodontinae	D
186638	2019-02-24	0	0	0	Akodon	montensis	Akodon montensis	3	2019	2	6	46	Itapua	3	Rodentia	Cricetidae	Sigmodontinae	D
186639	2019-02-24	0	0	0	Akodon	montensis	Akodon montensis	3	2019	1	2	30	Itapua	3	Rodentia	Cricetidae	Sigmodontinae	F
186640	2019-02-24	0	0	0	Akodon	azarae	Akodon azarae	2	2019	1	2	15	Itapua	3	Rodentia	Cricetidae	Sigmodontinae	F
186641	2019-02-24	0	0	0	Akodon	montensis	Akodon montensis	3	2019	1	2	30	Itapua	3	Rodentia	Cricetidae	Sigmodontinae	F
186642	2019-02-24	0	0	0	Akodon	azarae	Akodon azarae	3	2019	1	2	24	Itapua	3	Rodentia	Cricetidae	Sigmodontinae	F
186643	2019-02-24	0	0	0	Akodon	montensis	Akodon montensis	3	2019	1	2	26	Itapua	3	Rodentia	Cricetidae	Sigmodontinae	F
186644	2019-02-24	0	0	0	Akodon	montensis	Akodon montensis	3	2019	1	2	30	Itapua	3	Rodentia	Cricetidae	Sigmodontinae	F
186645	2019-02-24	0	0	0	Oligoryzomys	nigripes	Oligoryzomys nigripes	2	2019	2	3	14	Itapua	3	Rodentia	Cricetidae	Sigmodontinae	F
186646	2019-02-24	0	0	0	Akodon	montensis	Akodon montensis	2	2019	1	2	20	Itapua	3	Rodentia	Cricetidae	Sigmodontinae	F
186647	2019-02-24	0	0	0	Thaptomys	nigrita	Thaptomys nigrita	3	2019	2	3	13	Itapua	3	Rodentia	Cricetidae	Sigmodontinae	F
186648	2019-02-24	0	0	0	Akodon	azarae	Akodon azarae	3	2019	2	3	22	Itapua	3	Rodentia	Cricetidae	Sigmodontinae	F
186649	2019-02-24	0	0	0	Akodon	montensis	Akodon montensis	3	2019	2	4	40	Itapua	3	Rodentia	Cricetidae	Sigmodontinae	F
186650	2019-02-24	0	0	0	Akodon	montensis	Akodon montensis	3	2019	1	2	20	Itapua	3	Rodentia	Cricetidae	Sigmodontinae	F
186651	2019-02-24	0	0	0	Akodon	montensis	Akodon montensis	2	2019	1	2	24	Itapua	3	Rodentia	Cricetidae	Sigmodontinae	F
186652	2019-02-24	0	0	0	Akodon	azarae	Akodon azarae	1	2019	2	3	10	Itapua	3	Rodentia	Cricetidae	Sigmodontinae	A
186653	2019-02-24	0	0	0	Akodon	montensis	Akodon montensis	2	2019	1	2	23	Itapua	3	Rodentia	Cricetidae	Sigmodontinae	A
186654	2019-02-24	0	0	0	Akodon	montensis	Akodon montensis	2	2019	1	2	13	Itapua	3	Rodentia	Cricetidae	Sigmodontinae	A
186655	2019-02-24	0	0	0	Akodon	azarae	Akodon azarae	2	2019	1	2		Itapua	3	Rodentia	Cricetidae	Sigmodontinae	A
186656	2019-02-24	0	0	0	Akodon	azarae	Akodon azarae	2	2019	1	2	20	Itapua	3	Rodentia	Cricetidae	Sigmodontinae	A
186657	2019-02-24	0	0	0	Oligoryzomys	nigripes	Oligoryzomys nigripes	3	2019	2	6	30	Itapua	3	Rodentia	Cricetidae	Sigmodontinae	A
186658	2019-02-24	0	0	0	Akodon	azarae	Akodon azarae	2	2019	1	2	20	Itapua	3	Rodentia	Cricetidae	Sigmodontinae	C
186659	2019-02-24	0	0	0	Akodon	montensis	Akodon montensis	2	2019	1	2	17	Itapua	3	Rodentia	Cricetidae	Sigmodontinae	C
186660	2019-02-24	0	0	0	Akodon	montensis	Akodon montensis	2	2019	1	2	12	Itapua	3	Rodentia	Cricetidae	Sigmodontinae	C
186661	2019-02-24	0	0	0	Akodon	montensis	Akodon montensis	3	2019	1	1	28	Itapua	3	Rodentia	Cricetidae	Sigmodontinae	C
186662	2019-02-24	1	0	1	Akodon	montensis	Akodon montensis	3	2019	2	4	35	Itapua	3	Rodentia	Cricetidae	Sigmodontinae	C
186663	2019-02-24	0	0	0	Oligoryzomys	nigripes	Oligoryzomys nigripes	2	2019	1	2	10	Itapua	3	Rodentia	Cricetidae	Sigmodontinae	E
186664	2019-02-24	0	0	0	Akodon	azarae	Akodon azarae	3	2019	1	2	21	Itapua	3	Rodentia	Cricetidae	Sigmodontinae	E
186665	2019-02-24	0	0	0	Oligoryzomys	nigripes	Oligoryzomys nigripes	3	2019	2	5	29	Itapua	3	Rodentia	Cricetidae	Sigmodontinae	E
186666	2019-02-24	0	0	0	Oligoryzomys	nigripes	Oligoryzomys nigripes	3	2019	1	1	23	Itapua	3	Rodentia	Cricetidae	Sigmodontinae	E
186667	2019-02-24	0	0	0	Akodon	azarae	Akodon azarae	3	2019	1	2	22	Itapua	3	Rodentia	Cricetidae	Sigmodontinae	E
186668	2019-02-25	0	0	0	Akodon	montensis	Akodon montensis	3	2019	2	4	46	Itapua	3	Rodentia	Cricetidae	Sigmodontinae	D
186669	2019-02-25	0	0	0	Thaptomys	nigrita	Thaptomys nigrita	3	2019	1	2	17	Itapua	3	Rodentia	Cricetidae	Sigmodontinae	D
186670	2019-02-25	0	0	0	Oligoryzomys	nigripes	Oligoryzomys nigripes	3	2019	2	3	12	Itapua	3	Rodentia	Cricetidae	Sigmodontinae	D
186671	2019-02-25	0	0	0	Akodon	azarae	Akodon azarae	2	2019	1	2	16	Itapua	3	Rodentia	Cricetidae	Sigmodontinae	D
186672	2019-02-25	0	0	0	Akodon	montensis	Akodon montensis	3	2019	2	4	23	Itapua	3	Rodentia	Cricetidae	Sigmodontinae	D
186673	2019-02-25	0	1	1	Oligoryzomys	nigripes	Oligoryzomys nigripes	3	2019	2	6	25	Itapua	3	Rodentia	Cricetidae	Sigmodontinae	C
186674	2019-02-25	0	0	0	Akodon	azarae	Akodon azarae	2	2019	1	2	18	Itapua	3	Rodentia	Cricetidae	Sigmodontinae	C
186675	2019-02-25	0	0	0	Akodon	montensis	Akodon montensis	3	2019	2	3	27	Itapua	3	Rodentia	Cricetidae	Sigmodontinae	C
186676	2019-02-25	0	0	0	Euryoryzomys	sp	Euryoryzomys sp	3	2019	2	6	33	Itapua	3	Rodentia	Cricetidae	Sigmodontinae	C
186677	2019-02-25	0	0	0	Oligoryzomys	nigripes	Oligoryzomys nigripes	2	2019	1	2	16	Itapua	3	Rodentia	Cricetidae	Sigmodontinae	D
186678	2019-02-25	0	0	0	Akodon	montensis	Akodon montensis	3	2019	1	2	24	Itapua	3	Rodentia	Cricetidae	Sigmodontinae	D
186679	2019-02-25	0	0	0	Akodon	montensis	Akodon montensis	3	2019	1	2	26	Itapua	3	Rodentia	Cricetidae	Sigmodontinae	F
186680	2019-02-25	1	0	1	Akodon	montensis	Akodon montensis	3	2019	1	1	51	Itapua	3	Rodentia	Cricetidae	Sigmodontinae	F
186681	2019-02-25	0	0	0	Akodon	azarae	Akodon azarae	3	2019	2	3	26	Itapua	3	Rodentia	Cricetidae	Sigmodontinae	F
186682	2019-02-25	0	0	0	Akodon	azarae	Akodon azarae	3	2019	1	2	19	Itapua	3	Rodentia	Cricetidae	Sigmodontinae	B
186683	2019-02-25	0	0	0	Akodon	montensis	Akodon montensis	3	2019	2	4	24	Itapua	3	Rodentia	Cricetidae	Sigmodontinae	A
186684	2019-02-25	0	0	0	Akodon	azarae	Akodon azarae	2	2019	1	2	17	Itapua	3	Rodentia	Cricetidae	Sigmodontinae	B
186685	2019-02-25	0	0	0	Akodon	azarae	Akodon azarae	2	2019	2	3	24	Itapua	3	Rodentia	Cricetidae	Sigmodontinae	A
186686	2019-02-25	0	0	0	Oligoryzomys	nigripes	Oligoryzomys nigripes	3	2019	1	1	25	Itapua	3	Rodentia	Cricetidae	Sigmodontinae	E
186687	2019-02-25	0	0	0	Akodon	montensis	Akodon montensis	3	2019	1	2	27	Itapua	3	Rodentia	Cricetidae	Sigmodontinae	A
186688	2019-02-25	1	0	1	Akodon	montensis	Akodon montensis	3	2019	1	1	49	Itapua	3	Rodentia	Cricetidae	Sigmodontinae	F
186689	2019-02-25	0	0	0	Akodon	montensis	Akodon montensis	3	2019	2	5	36	Itapua	3	Rodentia	Cricetidae	Sigmodontinae	F
186690	2019-02-25	1	1	1	Oligoryzomys	flavescens	Oligoryzomys flavescens	3	2019	2	5	21	Itapua	3	Rodentia	Cricetidae	Sigmodontinae	F
186691	2019-02-25	0	0	0	Oligoryzomys	nigripes	Oligoryzomys nigripes	3	2019	2	6	18	Itapua	3	Rodentia	Cricetidae	Sigmodontinae	F
186692	2019-02-25	0	0	0	Oligoryzomys	nigripes	Oligoryzomys nigripes	3	2019	1	1	32	Itapua	3	Rodentia	Cricetidae	Sigmodontinae	C
186693	2019-02-25	0	0	0	Oligoryzomys	nigripes	Oligoryzomys nigripes	3	2019	2	3	23	Itapua	3	Rodentia	Cricetidae	Sigmodontinae	C
186694	2019-02-25	0	0	0	Akodon	montensis	Akodon montensis	3	2019	1	2	30	Itapua	3	Rodentia	Cricetidae	Sigmodontinae	F
186695	2019-02-25	0	0	0	Oligoryzomys	nigripes	Oligoryzomys nigripes	2	2019	2	3	10	Itapua	3	Rodentia	Cricetidae	Sigmodontinae	F
186696	2019-02-25	0	0	0	Akodon	montensis	Akodon montensis	3	2019	1	1	39	Itapua	3	Rodentia	Cricetidae	Sigmodontinae	F
186697	2019-02-25	0	0	0	Akodon	montensis	Akodon montensis	3	2019	1	2	27	Itapua	3	Rodentia	Cricetidae	Sigmodontinae	F
186698	2019-02-25	0	0	0	Oligoryzomys	nigripes	Oligoryzomys nigripes	3	2019	2	5	24	Itapua	3	Rodentia	Cricetidae	Sigmodontinae	F
186699	2019-02-25	0	0	0	Akodon	montensis	Akodon montensis	3	2019	1	1	45	Itapua	3	Rodentia	Cricetidae	Sigmodontinae	F
186700	2019-02-26	0	0	0	Oligoryzomys	nigripes	Oligoryzomys nigripes	2	2019	1	2	18	Itapua	3	Rodentia	Cricetidae	Sigmodontinae	D
186701	2019-02-26	0	0	0	Oligoryzomys	nigripes	Oligoryzomys nigripes	3	2019	2	5	22	Itapua	3	Rodentia	Cricetidae	Sigmodontinae	D
186702	2019-02-26	0	0	0	Akodon	azarae	Akodon azarae	2	2019	2	3	13	Itapua	3	Rodentia	Cricetidae	Sigmodontinae	D
186703	2019-02-26	0	0	0	Akodon	montensis	Akodon montensis	3	2019	1	2	27	Itapua	3	Rodentia	Cricetidae	Sigmodontinae	D
186704	2019-02-26	1	1	1	Oligoryzomys	flavescens	Oligoryzomys flavescens	3	2019	1	1	19	Itapua	3	Rodentia	Cricetidae	Sigmodontinae	D
186705	2019-02-26	0	0	0	Thaptomys	nigrita	Thaptomys nigrita	3	2019	2	3	13	Itapua	3	Rodentia	Cricetidae	Sigmodontinae	F
186706	2019-02-26	0	0	0	Akodon	azarae	Akodon azarae	3	2019	1	2	22	Itapua	3	Rodentia	Cricetidae	Sigmodontinae	F
186707	2019-02-26	0	0	0	Akodon	azarae	Akodon azarae	3	2019	2	3	25	Itapua	3	Rodentia	Cricetidae	Sigmodontinae	F
186708	2019-02-26	0	0	0	Oligoryzomys	nigripes	Oligoryzomys nigripes	2	2019	1	2	16	Itapua	3	Rodentia	Cricetidae	Sigmodontinae	F
186709	2019-02-26	0	0	0	Akodon	montensis	Akodon montensis	3	2019	1	1	45	Itapua	3	Rodentia	Cricetidae	Sigmodontinae	F
186710	2019-02-26	0	0	0	Akodon	montensis	Akodon montensis	3	2019	1	2	23	Itapua	3	Rodentia	Cricetidae	Sigmodontinae	F
186711	2019-02-26	0	0	0	Akodon	montensis	Akodon montensis	3	2019	2	3	33	Itapua	3	Rodentia	Cricetidae	Sigmodontinae	C
186712	2019-02-26	0	0	0	Akodon	azarae	Akodon azarae	2	2019	2	3	20	Itapua	3	Rodentia	Cricetidae	Sigmodontinae	C
186713	2019-02-26	0	0	0	Oligoryzomys	nigripes	Oligoryzomys nigripes	3	2019	1	2	22	Itapua	3	Rodentia	Cricetidae	Sigmodontinae	C
186714	2019-02-26	0	0	0	Akodon	montensis	Akodon montensis	3	2019	2	4	29	Itapua	3	Rodentia	Cricetidae	Sigmodontinae	F
186715	2019-02-26	0	0	0	Oligoryzomys	nigripes	Oligoryzomys nigripes	3	2019	2	5	24	Itapua	3	Rodentia	Cricetidae	Sigmodontinae	D
186716	2019-02-26	0	0	0	Akodon	montensis	Akodon montensis	3	2019	2	3	41	Itapua	3	Rodentia	Cricetidae	Sigmodontinae	C
186717	2019-02-26	0	0	0	Oligoryzomys	nigripes	Oligoryzomys nigripes	3	2019	2	5	16	Itapua	3	Rodentia	Cricetidae	Sigmodontinae	F
186718	2019-02-26	0	0	0	Oligoryzomys	nigripes	Oligoryzomys nigripes	3	2019	1	1	22	Itapua	3	Rodentia	Cricetidae	Sigmodontinae	F
186719	2019-02-26	0	0	0	Akodon	azarae	Akodon azarae	2	2019	1	2	25	Itapua	3	Rodentia	Cricetidae	Sigmodontinae	F
186720	2019-02-26	0	0	0	Oligoryzomys	flavescens	Oligoryzomys flavescens	3	2019	2	5	25	Itapua	3	Rodentia	Cricetidae	Sigmodontinae	F
186721	2019-02-26	0	0	0	Akodon	montensis	Akodon montensis	3	2019	1	2	31	Itapua	3	Rodentia	Cricetidae	Sigmodontinae	F
186722	2019-02-26	0	0	0	Akodon	montensis	Akodon montensis	3	2019	2	3	25	Itapua	3	Rodentia	Cricetidae	Sigmodontinae	D
186723	2019-02-26	0	0	0	Akodon	montensis	Akodon montensis	3	2019	2	3	27	Itapua	3	Rodentia	Cricetidae	Sigmodontinae	F
186724	2019-02-26	0	0	0	Akodon	montensis	Akodon montensis	3	2019	2	3	28	Itapua	3	Rodentia	Cricetidae	Sigmodontinae	F
186725	2019-02-26	0	0	0	Akodon	azarae	Akodon azarae	3	2019	1	2	24	Itapua	3	Rodentia	Cricetidae	Sigmodontinae	F
186726	2019-02-26	0	0	0	Akodon	montensis	Akodon montensis	3	2019	1	2	24	Itapua	3	Rodentia	Cricetidae	Sigmodontinae	B
186727	2019-02-26	0	0	0	Akodon	montensis	Akodon montensis	3	2019	1	1	38	Itapua	3	Rodentia	Cricetidae	Sigmodontinae	A
186728	2019-02-26	0	0	0	Oligoryzomys	flavescens	Oligoryzomys flavescens	2	2019	2	3	11	Itapua	3	Rodentia	Cricetidae	Sigmodontinae	D
186729	2019-02-26	0	0	0	Thaptomys	nigrita	Thaptomys nigrita	3	2019	1	2	14	Itapua	3	Rodentia	Cricetidae	Sigmodontinae	F
186730	2019-02-26	0	0	0	Akodon	montensis	Akodon montensis	3	2019	2	3	42	Itapua	3	Rodentia	Cricetidae	Sigmodontinae	E
186731	2019-02-26	0	0	0	Oligoryzomys	nigripes	Oligoryzomys nigripes	3	2019	1	1	20	Itapua	3	Rodentia	Cricetidae	Sigmodontinae	E
186732	2019-02-26	0	0	0	Akodon	azarae	Akodon azarae	3	2019	1	2	27	Itapua	3	Rodentia	Cricetidae	Sigmodontinae	B
186733	2019-02-26	0	0	0	Oligoryzomys	nigripes	Oligoryzomys nigripes	2	2019	1	2	12	Itapua	3	Rodentia	Cricetidae	Sigmodontinae	E
186734	2019-02-26	0	0	0	Akodon	azarae	Akodon azarae	3	2019	2	3	18	Itapua	3	Rodentia	Cricetidae	Sigmodontinae	E
186735	2019-02-26	0	0	0	Akodon	azarae	Akodon azarae	2	2019	2	3	16	Itapua	3	Rodentia	Cricetidae	Sigmodontinae	B
186736	2019-02-26	0	0	0	Akodon	azarae	Akodon azarae	3	2019	2	5	23	Itapua	3	Rodentia	Cricetidae	Sigmodontinae	B
186737	2019-02-26	0	0	0	Akodon	azarae	Akodon azarae	2	2019	1	2	15	Itapua	3	Rodentia	Cricetidae	Sigmodontinae	A
186738	2019-02-26	0	0	0	Akodon	montensis	Akodon montensis	3	2019	2	4	22	Itapua	3	Rodentia	Cricetidae	Sigmodontinae	F
186739	2019-02-26	0	0	0	Akodon	montensis	Akodon montensis	2	2019	2	3	19	Itapua	3	Rodentia	Cricetidae	Sigmodontinae	A
186740	2019-02-26	0	0	0	Oligoryzomys	nigripes	Oligoryzomys nigripes	2	2019	2	3	13	Itapua	3	Rodentia	Cricetidae	Sigmodontinae	B
186741	2019-02-26	0	0	0	Oligoryzomys	nigripes	Oligoryzomys nigripes	1	2019	1	2	8	Itapua	3	Rodentia	Cricetidae	Sigmodontinae	E
186742	2019-02-26	0	0	0	Oligoryzomys	sp	Oligoryzomys sp	1	2019	2	3	9	Itapua	3	Rodentia	Cricetidae	Sigmodontinae	B
186743	2019-02-26	0	0	0	Oligoryzomys	mattogrossae	Oligoryzomys mattogrossae	1	2019	1	2	10	Itapua	3	Rodentia	Cricetidae	Sigmodontinae	C
186744	2019-02-26	0	0	0	Oligoryzomys	flavescens	Oligoryzomys flavescens	1	2019	1	2	7	Itapua	3	Rodentia	Cricetidae	Sigmodontinae	B
186745	2019-02-26	0	0	0	Akodon	montensis	Akodon montensis	3	2019	1	2	30	Itapua	3	Rodentia	Cricetidae	Sigmodontinae	D
186746	2019-02-26	0	0	0	Akodon	montensis	Akodon montensis	3	2019	2	4	29	Itapua	3	Rodentia	Cricetidae	Sigmodontinae	F
186747	2019-02-26	0	0	0	Oligoryzomys	mattogrossae	Oligoryzomys mattogrossae	3	2019	2	5	26	Itapua	3	Rodentia	Cricetidae	Sigmodontinae	B
186748	2019-02-26	0	0	0	Akodon	azarae	Akodon azarae	3	2019	2	3	18	Itapua	3	Rodentia	Cricetidae	Sigmodontinae	B
186749	2019-02-26	0	0	0	Akodon	montensis	Akodon montensis	3	2019	1	1	41	Itapua	3	Rodentia	Cricetidae	Sigmodontinae	F
186750	2019-02-26	0	0	0	Akodon	montensis	Akodon montensis	3	2019	1	1	29	Itapua	3	Rodentia	Cricetidae	Sigmodontinae	F
206251	2019-02-26	0	0	0	Oligoryzomys	mattogrossae	Oligoryzomys mattogrossae	1	2019	1	2	8	Itapua	3	Rodentia	Cricetidae	Sigmodontinae	B
206252	2019-02-26	0	0	0	Oligoryzomys	nigripes	Oligoryzomys nigripes	3	2019	1	2	17	Itapua	3	Rodentia	Cricetidae	Sigmodontinae	E
206253	2019-02-26	0	0	0	Thaptomys	nigrita	Thaptomys nigrita	3	2019	1	2	15	Itapua	3	Rodentia	Cricetidae	Sigmodontinae	D
206254	2019-02-26	0	0	0	Oligoryzomys	nigripes	Oligoryzomys nigripes	3	2019	2	4	21	Itapua	3	Rodentia	Cricetidae	Sigmodontinae	F
206255	2019-02-26	0	0	0	Oligoryzomys	nigripes	Oligoryzomys nigripes	3	2019	2	3	24	Itapua	3	Rodentia	Cricetidae	Sigmodontinae	C
206256	2019-02-26	0	0	0	Akodon	montensis	Akodon montensis	3	2019	2	3	23	Itapua	3	Rodentia	Cricetidae	Sigmodontinae	D
206257	2019-02-26	0	0	0	Akodon	montensis	Akodon montensis	3	2019	2	4	35	Itapua	3	Rodentia	Cricetidae	Sigmodontinae	A
206258	2019-02-26	0	0	0	Akodon	azarae	Akodon azarae	1	2019	2	3	10	Itapua	3	Rodentia	Cricetidae	Sigmodontinae	B
206259	2019-02-26	0	0	0	Oligoryzomys	nigripes	Oligoryzomys nigripes	3	2019	1	1	23	Itapua	3	Rodentia	Cricetidae	Sigmodontinae	A
206260	2019-02-26	0	0	0	Oligoryzomys	nigripes	Oligoryzomys nigripes	3	2019	2	3	18	Itapua	3	Rodentia	Cricetidae	Sigmodontinae	C
206261	2019-02-26	0	0	0	Oligoryzomys	nigripes	Oligoryzomys nigripes	3	2019	2	3	20	Itapua	3	Rodentia	Cricetidae	Sigmodontinae	B
206262	2019-02-26	0	0	0	Akodon	azarae	Akodon azarae	3	2019	1	2	23	Itapua	3	Rodentia	Cricetidae	Sigmodontinae	A
206263	2019-02-26	0	0	0	Akodon	azarae	Akodon azarae	3	2019	2	3	20	Itapua	3	Rodentia	Cricetidae	Sigmodontinae	A
206264	2019-02-26	0	0	0	Akodon	azarae	Akodon azarae	3	2019	1	2	17	Itapua	3	Rodentia	Cricetidae	Sigmodontinae	A
206265	2019-02-26	0	0	0	Akodon	azarae	Akodon azarae	3	2019	2	3	23	Itapua	3	Rodentia	Cricetidae	Sigmodontinae	B
206266	2019-02-26	0	0	0	Oligoryzomys	nigripes	Oligoryzomys nigripes	1	2019	2	3	9	Itapua	3	Rodentia	Cricetidae	Sigmodontinae	C
206267	2019-02-26	0	0	0	Oligoryzomys	nigripes	Oligoryzomys nigripes	3	2019	2	5	32	Itapua	3	Rodentia	Cricetidae	Sigmodontinae	A
206268	2019-02-26	1	0	1	Akodon	azarae	Akodon azarae	1	2019	1	2	13	Itapua	3	Rodentia	Cricetidae	Sigmodontinae	B
206269	2019-02-26	1	1	1	Oligoryzomys	nigripes	Oligoryzomys nigripes	3	2019	2	5	28	Itapua	3	Rodentia	Cricetidae	Sigmodontinae	D
206270	2019-02-26	0	0	0	Akodon	montensis	Akodon montensis	2	2019	1	2	20	Itapua	3	Rodentia	Cricetidae	Sigmodontinae	A
206271	2019-02-26	0	0	0	Oligoryzomys	nigripes	Oligoryzomys nigripes	3	2019	2	3	22	Itapua	3	Rodentia	Cricetidae	Sigmodontinae	B
206272	2019-02-26	0	0	0	Akodon	azarae	Akodon azarae	2	2019	1	2	21	Itapua	3	Rodentia	Cricetidae	Sigmodontinae	B
206273	2019-02-26	0	0	0	Akodon	montensis	Akodon montensis	2	2019	2	3	22	Itapua	3	Rodentia	Cricetidae	Sigmodontinae	D
206274	2019-02-26	0	0	0	Akodon	montensis	Akodon montensis	3	2019	2	4	33	Itapua	3	Rodentia	Cricetidae	Sigmodontinae	A
206275	2019-02-26	0	0	0	Akodon	azarae	Akodon azarae	3	2019	2	3	26	Itapua	3	Rodentia	Cricetidae	Sigmodontinae	A
206276	2019-02-26	0	0	0	Oligoryzomys	nigripes	Oligoryzomys nigripes	2	2019	2	5	16	Itapua	3	Rodentia	Cricetidae	Sigmodontinae	A
206277	2019-02-26	0	0	0	Akodon	azarae	Akodon azarae	1	2019	2	3	9	Itapua	3	Rodentia	Cricetidae	Sigmodontinae	B
206278	2019-02-26	0	0	0	Akodon	montensis	Akodon montensis	3	2019	2	3	22	Itapua	3	Rodentia	Cricetidae	Sigmodontinae	F
206279	2019-02-26	0	0	0	Akodon	azarae	Akodon azarae	3	2019	1	2	23	Itapua	3	Rodentia	Cricetidae	Sigmodontinae	E
206280	2019-02-26	0	0	0	Oligoryzomys	nigripes	Oligoryzomys nigripes	2	2019	1	2	16	Itapua	3	Rodentia	Cricetidae	Sigmodontinae	B
206281	2019-02-26	0	0	0	Akodon	azarae	Akodon azarae	2	2019	2	3	14	Itapua	3	Rodentia	Cricetidae	Sigmodontinae	B
206282	2019-02-26	0	0	0	Akodon	montensis	Akodon montensis	3	2019	1	2	24	Itapua	3	Rodentia	Cricetidae	Sigmodontinae	F
206283	2019-02-26	0	0	0	Akodon	montensis	Akodon montensis	3	2019	2	3	31	Itapua	3	Rodentia	Cricetidae	Sigmodontinae	A
206284	2019-02-26	0	1	1	Oligoryzomys	nigripes	Oligoryzomys nigripes	3	2019	2	5	29	Itapua	3	Rodentia	Cricetidae	Sigmodontinae	A
206285	2019-02-26	0	0	0	Akodon	azarae	Akodon azarae	2	2019	2	3	19	Itapua	3	Rodentia	Cricetidae	Sigmodontinae	C
206286	2019-02-26	0	0	0	Oligoryzomys	flavescens	Oligoryzomys flavescens	2	2019	2	3	10	Itapua	3	Rodentia	Cricetidae	Sigmodontinae	B
206287	2019-02-26	0	0	0	Thaptomys	nigrita	Thaptomys nigrita	3	2019	2	3	11	Itapua	3	Rodentia	Cricetidae	Sigmodontinae	D
206288	2019-02-26	0	0	0	Oligoryzomys	nigripes	Oligoryzomys nigripes	2	2019	1	2	14	Itapua	3	Rodentia	Cricetidae	Sigmodontinae	A
206289	2019-02-26	0	0	0	Oligoryzomys	nigripes	Oligoryzomys nigripes	3	2019	1	1	18	Itapua	3	Rodentia	Cricetidae	Sigmodontinae	F
206290	2019-02-26	0	0	0	Sooretamys	angouya	Sooretamys angouya	3	2019	1	1	115	Itapua	3	Rodentia	Cricetidae	Sigmodontinae	C
206291	2019-02-26	0	0	0	Akodon	montensis	Akodon montensis	3	2019	2	3	21	Itapua	3	Rodentia	Cricetidae	Sigmodontinae	F
206292	2019-02-26	0	0	0	Oligoryzomys	nigripes	Oligoryzomys nigripes	3	2019	2	3	20	Itapua	3	Rodentia	Cricetidae	Sigmodontinae	F
206293	2019-02-26	0	0	0	Akodon	azarae	Akodon azarae	1	2019	1	2	13	Itapua	3	Rodentia	Cricetidae	Sigmodontinae	F
206294	2019-02-26	0	0	0	Akodon	azarae	Akodon azarae	2	2019	1	2	15	Itapua	3	Rodentia	Cricetidae	Sigmodontinae	F
206295	2019-02-26	0	0	0	Akodon	montensis	Akodon montensis	3	2019	2	3	21	Itapua	3	Rodentia	Cricetidae	Sigmodontinae	E
206296	2019-02-26	0	0	0	Oligoryzomys	nigripes	Oligoryzomys nigripes	3	2019	1	1	22	Itapua	3	Rodentia	Cricetidae	Sigmodontinae	C
206297	2019-02-26	0	0	0	Akodon	azarae	Akodon azarae	2	2019	1	2	17	Itapua	3	Rodentia	Cricetidae	Sigmodontinae	C
206298	2019-02-26	0	0	0	Oligoryzomys	nigripes	Oligoryzomys nigripes	3	2019	2	5	24	Itapua	3	Rodentia	Cricetidae	Sigmodontinae	C
206299	2019-02-26	0	0	0	Akodon	montensis	Akodon montensis	3	2019	2	3	24	Itapua	3	Rodentia	Cricetidae	Sigmodontinae	D
206300	2019-02-26	0	0	0	Oligoryzomys	nigripes	Oligoryzomys nigripes	2	2019	1	2	11	Itapua	3	Rodentia	Cricetidae	Sigmodontinae	E
206301	2019-02-26	0	0	0	Oligoryzomys	nigripes	Oligoryzomys nigripes	2	2019	2	3	13	Itapua	3	Rodentia	Cricetidae	Sigmodontinae	D
206302	2019-02-26	0	0	0	Akodon	azarae	Akodon azarae	3	2019	2	3	18	Itapua	3	Rodentia	Cricetidae	Sigmodontinae	C
206303	2019-02-26	0	0	0	Oligoryzomys	mattogrossae	Oligoryzomys mattogrossae	1	2019	2	3	9	Itapua	3	Rodentia	Cricetidae	Sigmodontinae	D
206304	2019-02-26	0	0	0	Oligoryzomys	mattogrossae	Oligoryzomys mattogrossae	2	2019	2	3	11	Itapua	3	Rodentia	Cricetidae	Sigmodontinae	E
206305	2019-03-01	0	0	0	Akodon	montensis	Akodon montensis	3	2019	1	1	58	Itapua	3	Rodentia	Cricetidae	Sigmodontinae	C
206306	2019-03-01	0	0	0	Akodon	montensis	Akodon montensis	2	2019	1	2	22	Itapua	3	Rodentia	Cricetidae	Sigmodontinae	C
206307	2019-03-01	0	0	0	Akodon	montensis	Akodon montensis	3	2019	1	2	27	Itapua	3	Rodentia	Cricetidae	Sigmodontinae	C
206308	2019-03-01	0	0	0	Akodon	montensis	Akodon montensis	3	2019	2	5	35	Itapua	3	Rodentia	Cricetidae	Sigmodontinae	C
206309	2019-03-01	0	0	0	Akodon	azarae	Akodon azarae	3	2019	2	3	25	Itapua	3	Rodentia	Cricetidae	Sigmodontinae	C
206310	2019-03-01	0	0	0	Akodon	azarae	Akodon azarae	2	2019	1	2	24	Itapua	3	Rodentia	Cricetidae	Sigmodontinae	C
206311	2019-03-01	0	0	0	Akodon	montensis	Akodon montensis	3	2019	1	1	32	Itapua	3	Rodentia	Cricetidae	Sigmodontinae	A
206312	2019-03-01	0	0	0	Akodon	montensis	Akodon montensis	3	2019	1	1	58	Itapua	3	Rodentia	Cricetidae	Sigmodontinae	A
206313	2019-03-01	0	0	0	Akodon	montensis	Akodon montensis	3	2019	1	2	24	Itapua	3	Rodentia	Cricetidae	Sigmodontinae	A
206314	2019-03-01	0	0	0	Monodelphis	dimidiata	Monodelphis dimidiata	2	2019	2	3	10	Itapua	3	Didelphimorphia	Didelphidae	Didelphinae	A
206315	2019-03-01	0	0	0	Oligoryzomys	nigripes	Oligoryzomys nigripes	2	2019	2	3	14	Itapua	3	Rodentia	Cricetidae	Sigmodontinae	B
206316	2019-03-01	0	0	0	Akodon	montensis	Akodon montensis	1	2019	1	2	10	Itapua	3	Rodentia	Cricetidae	Sigmodontinae	B
206317	2019-03-01	0	0	0	Mus	musculus	Mus musculus	3	2019	2	3	13	Itapua	3	Rodentia	Muridae	Murinae	B
206318	2019-03-01	0	0	0	Mus	musculus	Mus musculus	3	2019	1	2	12	Itapua	3	Rodentia	Muridae	Murinae	B
206319	2019-03-02	0	0	0	Akodon	montensis	Akodon montensis	1	2019	2	3	12	Itapua	3	Rodentia	Cricetidae	Sigmodontinae	E
206320	2019-03-02	0	0	0	Akodon	azarae	Akodon azarae	2	2019	1	2	13	Itapua	3	Rodentia	Cricetidae	Sigmodontinae	E
206321	2019-03-02	0	0	0	Akodon	montensis	Akodon montensis	1	2019	2	5	14	Itapua	3	Rodentia	Cricetidae	Sigmodontinae	E
206322	2019-03-02	0	0	0	Mus	musculus	Mus musculus	3	2019	2	5	13	Itapua	3	Rodentia	Muridae	Murinae	E
206323	2019-03-02	0	0	0	Mus	musculus	Mus musculus	2	2019	2	3	9	Itapua	3	Rodentia	Muridae	Murinae	E
206324	2019-03-02	0	0	0	Mus	musculus	Mus musculus	3	2019	1	2	8	Itapua	3	Rodentia	Muridae	Murinae	D
206325	2019-03-02	0	0	0	Akodon	sp	Akodon sp	3	2019	1	2	24	Itapua	3	Rodentia	Cricetidae	Sigmodontinae	D
206326	2019-03-02	0	0	0	Akodon	montensis	Akodon montensis	3	2019	2	5	29	Itapua	3	Rodentia	Cricetidae	Sigmodontinae	C
206327	2019-03-02	0	0	0	Mus	musculus	Mus musculus	3	2019	2	5	13	Itapua	3	Rodentia	Muridae	Murinae	A
206328	2019-03-02	0	0	0	Akodon	azarae	Akodon azarae	3	2019	1	2	17	Itapua	3	Rodentia	Cricetidae	Sigmodontinae	C
206329	2019-03-02	0	0	0	Oligoryzomys	nigripes	Oligoryzomys nigripes	3	2019	1	1	17	Itapua	3	Rodentia	Cricetidae	Sigmodontinae	C
206330	2019-03-02	0	0	0	Akodon	montensis	Akodon montensis	3	2019	2	3	35	Itapua	3	Rodentia	Cricetidae	Sigmodontinae	F
206331	2019-03-02	0	0	0	Mus	musculus	Mus musculus	3	2019	1	1	16	Itapua	3	Rodentia	Muridae	Murinae	F
206332	2019-03-02	0	0	0	Mus	musculus	Mus musculus	2	2019	1	2	10	Itapua	3	Rodentia	Muridae	Murinae	E
206333	2019-03-02	0	0	0	Mus	musculus	Mus musculus	3	2019	2	3	14	Itapua	3	Rodentia	Muridae	Murinae	E
206334	2019-03-02	0	0	0	Mus	musculus	Mus musculus	3	2019	1	2	12	Itapua	3	Rodentia	Muridae	Murinae	E
206335	2019-03-02	0	0	0	Mus	musculus	Mus musculus	3	2019	2	3	14	Itapua	3	Rodentia	Muridae	Murinae	E
206336	2019-03-02	0	0	0	Mus	musculus	Mus musculus	3	2019	2	3	12	Itapua	3	Rodentia	Muridae	Murinae	E
206337	2019-03-02	0	0	0	Mus	musculus	Mus musculus	2	2019	1	2	8	Itapua	3	Rodentia	Muridae	Murinae	E
206338	2019-03-02	0	0	0	Mus	musculus	Mus musculus	3	2019	1	2	12	Itapua	3	Rodentia	Muridae	Murinae	E
206339	2019-03-02	0	0	0	Akodon	azarae	Akodon azarae	2	2019	1	1	16	Itapua	3	Rodentia	Cricetidae	Sigmodontinae	E
206340	2019-03-02	0	0	0	Monodelphis	dimidiata	Monodelphis dimidiata	3	2019	2	3	31	Itapua	3	Didelphimorphia	Didelphidae	Didelphinae	C
206343	2019-06-06	1	0	1	Akodon	toba	Akodon toba	3	2019	2	3	22	Boqueron	3	Rodentia	Cricetidae	Sigmodontinae	B
206344	2019-06-06	0	0	0	Akodon	toba	Akodon toba	3	2019	1	1	48	Boqueron	3	Rodentia	Cricetidae	Sigmodontinae	B
206345	2019-06-06	0	0	0	Akodon	toba	Akodon toba	3	2019	2	3	16	Boqueron	3	Rodentia	Cricetidae	Sigmodontinae	E
206346	2019-06-06	0	0	0	Graomys	chacoensis	Graomys chacoensis	3	2019	1	2	50	Boqueron	3	Rodentia	Cricetidae	Sigmodontinae	A
206347	2019-06-06	0	0	0	Graomys	chacoensis	Graomys chacoensis	3	2019	2	4	58	Boqueron	3	Rodentia	Cricetidae	Sigmodontinae	A
206348	2019-06-06	0	0	0	Akodon	toba	Akodon toba	3	2019	2	3	30	Boqueron	3	Rodentia	Cricetidae	Sigmodontinae	B
206349	2019-06-06	0	0	0	Akodon	toba	Akodon toba	2	2019	2	3	25	Boqueron	3	Rodentia	Cricetidae	Sigmodontinae	B
206350	2019-06-06	0	0	0	Oligoryzomys	chacoensis	Oligoryzomys chacoensis	3	2019	1	1	21	Boqueron	3	Rodentia	Cricetidae	Sigmodontinae	A
206351	2019-06-06	0	0	0	Graomys	chacoensis	Graomys chacoensis	3	2019	1	2	56	Boqueron	3	Rodentia	Cricetidae	Sigmodontinae	E
206352	2019-06-06	0	0	0	Akodon	toba	Akodon toba	3	2019	1	1	59	Boqueron	3	Rodentia	Cricetidae	Sigmodontinae	E
206353	2019-06-06	0	0	0	Akodon	toba	Akodon toba	3	2019	1	1	29	Boqueron	3	Rodentia	Cricetidae	Sigmodontinae	E
206354	2019-06-06	0	0	0	Graomys	chacoensis	Graomys chacoensis	3	2019	1	2	49	Boqueron	3	Rodentia	Cricetidae	Sigmodontinae	A
206355	2019-06-06	0	0	0	Calomys	laucha	Calomys laucha	3	2019	2	5	21	Boqueron	3	Rodentia	Cricetidae	Sigmodontinae	C
206356	2019-06-06	0	0	0	Akodon	toba	Akodon toba	3	2019	2	4	34	Boqueron	3	Rodentia	Cricetidae	Sigmodontinae	A
206357	2019-06-06	0	0	0	Akodon	toba	Akodon toba	3	2019	2	4	46	Boqueron	3	Rodentia	Cricetidae	Sigmodontinae	E
206358	2019-06-06	0	0	0	Andalgalomys	pearsoni	Andalgalomys pearsoni	2	2019	2	3	28	Boqueron	3	Rodentia	Cricetidae	Sigmodontinae	B
206359	2019-06-06	0	0	0	Akodon	toba	Akodon toba	3	2019	1	1	56	Boqueron	3	Rodentia	Cricetidae	Sigmodontinae	E
206360	2019-06-06	0	0	0	Akodon	toba	Akodon toba	3	2019	2	5	48	Boqueron	3	Rodentia	Cricetidae	Sigmodontinae	E
206361	2019-06-06	0	0	0	Graomys	chacoensis	Graomys chacoensis	3	2019	1	2	36	Boqueron	3	Rodentia	Cricetidae	Sigmodontinae	E
206362	2019-06-07	0	0	0	Oligoryzomys	chacoensis	Oligoryzomys chacoensis	3	2019	2	5	18	Boqueron	3	Rodentia	Cricetidae	Sigmodontinae	E
206363	2019-06-07	0	0	0	Calomys	callosus	Calomys callosus	3	2019	1	2	18	Boqueron	3	Rodentia	Cricetidae	Sigmodontinae	E
206364	2019-06-07	0	0	0	Akodon	toba	Akodon toba	3	2019	2	3	72	Boqueron	3	Rodentia	Cricetidae	Sigmodontinae	E
206365	2019-06-07	1	0	1	Graomys	chacoensis	Graomys chacoensis	3	2019	1	2	49	Boqueron	3	Rodentia	Cricetidae	Sigmodontinae	D
206366	2019-06-07	0	0	0	Calomys	laucha	Calomys laucha	3	2019	2	5	15	Boqueron	3	Rodentia	Cricetidae	Sigmodontinae	B
206367	2019-06-07	0	0	0	Graomys	chacoensis	Graomys chacoensis	3	2019	1	2	32	Boqueron	3	Rodentia	Cricetidae	Sigmodontinae	B
206368	2019-06-07	0	0	0	Calomys	laucha	Calomys laucha	2	2019	1	2	7	Boqueron	3	Rodentia	Cricetidae	Sigmodontinae	B
206369	2019-06-07	0	0	0	Calomys	laucha	Calomys laucha	3	2019	2	5	11	Boqueron	3	Rodentia	Cricetidae	Sigmodontinae	B
206370	2019-06-07	0	0	0	Akodon	toba	Akodon toba	2	2019	2	3	18	Boqueron	3	Rodentia	Cricetidae	Sigmodontinae	B
206371	2019-06-07	0	0	0	Akodon	toba	Akodon toba	2	2019	1	2	23	Boqueron	3	Rodentia	Cricetidae	Sigmodontinae	B
206372	2019-06-07	0	0	0	Oligoryzomys	chacoensis	Oligoryzomys chacoensis	3	2019	2	5	19	Boqueron	3	Rodentia	Cricetidae	Sigmodontinae	D
206373	2019-06-07	0	0	0	Thylamys	pusillus	Thylamys pusillus	3	2019	1	1	16	Boqueron	3	Didelphimorphia	Didelphidae	Didelphinae	E
206374	2019-06-07	1	0	1	Graomys	chacoensis	Graomys chacoensis	3	2019	1	1	90	Boqueron	3	Rodentia	Cricetidae	Sigmodontinae	A
206375	2019-06-07	0	0	0	Graomys	chacoensis	Graomys chacoensis	3	2019	1	2	48	Boqueron	3	Rodentia	Cricetidae	Sigmodontinae	A
206376	2019-06-07	0	0	0	Akodon	toba	Akodon toba	3	2019	2	3	31	Boqueron	3	Rodentia	Cricetidae	Sigmodontinae	D
206377	2019-06-07	0	0	0	Akodon	toba	Akodon toba	3	2019	2	3	34	Boqueron	3	Rodentia	Cricetidae	Sigmodontinae	B
206378	2019-06-07	0	0	0	Graomys	chacoensis	Graomys chacoensis	3	2019	2	3	56	Boqueron	3	Rodentia	Cricetidae	Sigmodontinae	A
206379	2019-06-07	0	0	0	Akodon	toba	Akodon toba	2	2019	2	3	13	Boqueron	3	Rodentia	Cricetidae	Sigmodontinae	A
206380	2019-06-07	0	0	0	Calomys	laucha	Calomys laucha	2	2019	2	3	10	Boqueron	3	Rodentia	Cricetidae	Sigmodontinae	D
206381	2019-06-07	0	0	0	Calomys	laucha	Calomys laucha	3	2019	2	3	14	Boqueron	3	Rodentia	Cricetidae	Sigmodontinae	A
206382	2019-06-07	0	0	0	Graomys	chacoensis	Graomys chacoensis	3	2019	1	1	47	Boqueron	3	Rodentia	Cricetidae	Sigmodontinae	C
206383	2019-06-08	0	0	0	Galea	musteloides	Galea musteloides	3	2019	2	3	264	Boqueron	3	Rodentia	Caviidae	Caviinae	E
206384	2019-06-08	0	0	0	Calomys	callosus	Calomys callosus	2	2019	1	2	16	Boqueron	3	Rodentia	Cricetidae	Sigmodontinae	E
206385	2019-06-08	0	0	0	Akodon	toba	Akodon toba	3	2019	2	6	48	Boqueron	3	Rodentia	Cricetidae	Sigmodontinae	B
206386	2019-06-08	0	0	0	Akodon	toba	Akodon toba	2	2019	1	2	8	Boqueron	3	Rodentia	Cricetidae	Sigmodontinae	B
206387	2019-06-08	0	0	0	Graomys	chacoensis	Graomys chacoensis	3	2019	1	2	59	Boqueron	3	Rodentia	Cricetidae	Sigmodontinae	E
206388	2019-06-08	0	0	0	Akodon	toba	Akodon toba	3	2019	2	3	38	Boqueron	3	Rodentia	Cricetidae	Sigmodontinae	F
206389	2019-06-08	0	0	0	Akodon	toba	Akodon toba	3	2019	1	2	38	Boqueron	3	Rodentia	Cricetidae	Sigmodontinae	B
206390	2019-06-08	0	0	0	Oligoryzomys	chacoensis	Oligoryzomys chacoensis	3	2019	1	1	21	Boqueron	3	Rodentia	Cricetidae	Sigmodontinae	E
206391	2019-06-08	0	0	0	Oligoryzomys	mattogrossae	Oligoryzomys mattogrossae	2	2019	1	2	8	Boqueron	3	Rodentia	Cricetidae	Sigmodontinae	B
206392	2019-06-08	0	0	0	Calomys	laucha	Calomys laucha	3	2019	2	3	11	Boqueron	3	Rodentia	Cricetidae	Sigmodontinae	B
206393	2019-06-08	0	0	0	Graomys	chacoensis	Graomys chacoensis	3	2019	1	2	73	Boqueron	3	Rodentia	Cricetidae	Sigmodontinae	E
206394	2019-06-08	0	0	0	Akodon	toba	Akodon toba	3	2019	2	5	55	Boqueron	3	Rodentia	Cricetidae	Sigmodontinae	E
206395	2019-06-09	0	0	0	Calomys	laucha	Calomys laucha	3	2019	1	1	10	Boqueron	3	Rodentia	Cricetidae	Sigmodontinae	G
206396	2019-06-09	0	0	0	Graomys	chacoensis	Graomys chacoensis	3	2019	1	1	44	Boqueron	3	Rodentia	Cricetidae	Sigmodontinae	A
206397	2019-06-09	0	0	0	Graomys	chacoensis	Graomys chacoensis	3	2019	1	2	41	Boqueron	3	Rodentia	Cricetidae	Sigmodontinae	B
206398	2019-06-09	0	0	0	Akodon	toba	Akodon toba	3	2019	1	2	36	Boqueron	3	Rodentia	Cricetidae	Sigmodontinae	B
206399	2019-06-09	0	0	0	Graomys	chacoensis	Graomys chacoensis	3	2019	2	3	41	Boqueron	3	Rodentia	Cricetidae	Sigmodontinae	A
206400	2019-06-09	0	0	0	Oligoryzomys	chacoensis	Oligoryzomys chacoensis	3	2019	2	5	23	Boqueron	3	Rodentia	Cricetidae	Sigmodontinae	A
206401	2019-06-09	0	0	0	Akodon	toba	Akodon toba	3	2019	2	3	51	Boqueron	3	Rodentia	Cricetidae	Sigmodontinae	E
206402	2019-06-09	0	0	0	Calomys	callosus	Calomys callosus	3	2019	2	3	19	Boqueron	3	Rodentia	Cricetidae	Sigmodontinae	E
206403	2019-06-09	0	0	0	Akodon	toba	Akodon toba	3	2019	1	1	49	Boqueron	3	Rodentia	Cricetidae	Sigmodontinae	E
206404	2019-06-09	0	0	0	Graomys	chacoensis	Graomys chacoensis	3	2019	2	6	65	Boqueron	3	Rodentia	Cricetidae	Sigmodontinae	E
206405	2019-06-09	0	0	0	Akodon	toba	Akodon toba	2	2019	2	3	20	Boqueron	3	Rodentia	Cricetidae	Sigmodontinae	E
206406	2019-06-09	0	0	0	Graomys	chacoensis	Graomys chacoensis	3	2019	2	3	52	Boqueron	3	Rodentia	Cricetidae	Sigmodontinae	E
206407	2019-06-09	0	0	0	Akodon	toba	Akodon toba	2	2019	1	2	13	Boqueron	3	Rodentia	Cricetidae	Sigmodontinae	C
206408	2019-06-09	0	0	0	Akodon	toba	Akodon toba	3	2019	1	2	49	Boqueron	3	Rodentia	Cricetidae	Sigmodontinae	C
206409	2019-06-09	1	0	1	Graomys	chacoensis	Graomys chacoensis	3	2019	1	2	56	Boqueron	3	Rodentia	Cricetidae	Sigmodontinae	F
206410	2019-06-09	0	0	0	Akodon	toba	Akodon toba	3	2019	1	2	35	Boqueron	3	Rodentia	Cricetidae	Sigmodontinae	B
206411	2019-06-09	0	0	0	Oligoryzomys	chacoensis	Oligoryzomys chacoensis	3	2019	1	2	14	Boqueron	3	Rodentia	Cricetidae	Sigmodontinae	E
206412	2019-06-09	0	0	0	Galea	musteloides	Galea musteloides	3	2019	2	4	192	Boqueron	3	Rodentia	Caviidae	Caviinae	B
206413	2019-06-09	0	0	0	Oligoryzomys	mattogrossae	Oligoryzomys mattogrossae	2	2019	2	3	7	Boqueron	3	Rodentia	Cricetidae	Sigmodontinae	B
206414	2019-06-10	0	0	0	Akodon	toba	Akodon toba	2	2019	1	2	25	Boqueron	3	Rodentia	Cricetidae	Sigmodontinae	E
206415	2019-06-10	0	0	0	Calomys	laucha	Calomys laucha	3	2019	1	1	10	Boqueron	3	Rodentia	Cricetidae	Sigmodontinae	G
206416	2019-06-10	0	0	0	Calomys	laucha	Calomys laucha	2	2019	1	2	7	Boqueron	3	Rodentia	Cricetidae	Sigmodontinae	B
206417	2019-06-10	0	0	0	Oligoryzomys	chacoensis	Oligoryzomys chacoensis	3	2019	1	1	18	Boqueron	3	Rodentia	Cricetidae	Sigmodontinae	B
206418	2019-06-10	0	0	0	Gracilinanus	agilis	Gracilinanus agilis	3	2019	1	1	14	Boqueron	3	Didelphimorphia	Didelphidae	Didelphinae	A
206419	2019-06-10	0	0	0	Akodon	toba	Akodon toba	3	2019	2	5	69	Boqueron	3	Rodentia	Cricetidae	Sigmodontinae	C
206420	2019-06-10	0	0	0	Akodon	toba	Akodon toba	2	2019	1	2	23	Boqueron	3	Rodentia	Cricetidae	Sigmodontinae	F
206421	2019-06-10	0	0	0	Graomys	chacoensis	Graomys chacoensis	3	2019	1	1	49	Boqueron	3	Rodentia	Cricetidae	Sigmodontinae	F
206422	2019-06-10	0	0	0	Necromys	lasiurus	Necromys lasiurus	3	2019	1	1	39	Boqueron	3	Rodentia	Cricetidae	Sigmodontinae	G
206423	2019-06-10	0	0	0	Akodon	toba	Akodon toba	2	2019	1	2	26	Boqueron	3	Rodentia	Cricetidae	Sigmodontinae	E
206424	2019-06-10	0	0	0	Calomys	laucha	Calomys laucha	3	2019	1	2	9	Boqueron	3	Rodentia	Cricetidae	Sigmodontinae	C
206425	2019-06-10	0	0	0	Calomys	laucha	Calomys laucha	3	2019	1	1	10	Boqueron	3	Rodentia	Cricetidae	Sigmodontinae	C
206426	2019-06-10	0	0	0	Oligoryzomys	mattogrossae	Oligoryzomys mattogrossae	2	2019	1	2	8	Boqueron	3	Rodentia	Cricetidae	Sigmodontinae	B
206427	2019-06-11	1	0	1	Necromys	lasiurus	Necromys lasiurus	2	2019	1	2	25	Boqueron	3	Rodentia	Cricetidae	Sigmodontinae	D
206428	2019-06-11	0	0	0	Monodelphis	kunsi	Monodelphis kunsi	3	2019	2	6	7	Boqueron	3	Didelphimorphia	Didelphidae	Didelphinae	A
206429	2019-06-11	0	0	0	Necromys	lasiurus	Necromys lasiurus	2	2019	1	2	20	Boqueron	3	Rodentia	Cricetidae	Sigmodontinae	B
206430	2019-06-11	0	0	0	Necromys	lasiurus	Necromys lasiurus	3	2019	2	6	43	Boqueron	3	Rodentia	Cricetidae	Sigmodontinae	D
206431	2019-06-11	0	0	0	Necromys	lasiurus	Necromys lasiurus	2	2019	1	2	17	Boqueron	3	Rodentia	Cricetidae	Sigmodontinae	C
206432	2019-06-11	0	0	0	Akodon	toba	Akodon toba	3	2019	1	1	47	Boqueron	3	Rodentia	Cricetidae	Sigmodontinae	C
206433	2019-06-11	0	0	0	Necromys	lasiurus	Necromys lasiurus	3	2019	1	1	28	Boqueron	3	Rodentia	Cricetidae	Sigmodontinae	C
206434	2019-06-11	0	0	0	Akodon	toba	Akodon toba	3	2019	2	3	38	Boqueron	3	Rodentia	Cricetidae	Sigmodontinae	A
206435	2019-06-11	0	0	0	Oligoryzomys	chacoensis	Oligoryzomys chacoensis	3	2019	2	3	13	Boqueron	3	Rodentia	Cricetidae	Sigmodontinae	A
206436	2019-06-11	0	0	0	Akodon	toba	Akodon toba	3	2019	1	2	29	Boqueron	3	Rodentia	Cricetidae	Sigmodontinae	E
206437	2019-06-11	0	0	0	Akodon	toba	Akodon toba	2	2019	2	3	24	Boqueron	3	Rodentia	Cricetidae	Sigmodontinae	E
206438	2019-06-11	0	0	0	Akodon	toba	Akodon toba	3	2019	2	6	39	Boqueron	3	Rodentia	Cricetidae	Sigmodontinae	C
206439	2019-06-11	0	0	0	Necromys	lasiurus	Necromys lasiurus	3	2019	1	1	42	Boqueron	3	Rodentia	Cricetidae	Sigmodontinae	D
206440	2019-06-11	0	0	0	Necromys	lasiurus	Necromys lasiurus	3	2019	1	2	48	Boqueron	3	Rodentia	Cricetidae	Sigmodontinae	D
206441	2019-06-11	0	0	0	Necromys	lasiurus	Necromys lasiurus	2	2019	1	2	18	Boqueron	3	Rodentia	Cricetidae	Sigmodontinae	D
206442	2019-06-11	0	0	0	Akodon	toba	Akodon toba	3	2019	2	3	30	Boqueron	3	Rodentia	Cricetidae	Sigmodontinae	C
206443	2019-06-12	0	0	0	Calomys	laucha	Calomys laucha	3	2019	1	1	12	Boqueron	3	Rodentia	Cricetidae	Sigmodontinae	D
206444	2019-06-12	0	0	0	Necromys	lasiurus	Necromys lasiurus	3	2019	2	6	29	Boqueron	3	Rodentia	Cricetidae	Sigmodontinae	E
206445	2019-06-12	0	0	0	Necromys	lasiurus	Necromys lasiurus	3	2019	1	1	30	Boqueron	3	Rodentia	Cricetidae	Sigmodontinae	F
206446	2019-06-12	0	0	0	Necromys	lasiurus	Necromys lasiurus	3	2019	2	3	26	Boqueron	3	Rodentia	Cricetidae	Sigmodontinae	D
206447	2019-06-12	0	0	0	Calomys	laucha	Calomys laucha	3	2019	2	3	9	Boqueron	3	Rodentia	Cricetidae	Sigmodontinae	D
206448	2019-06-12	0	0	0	Necromys	lasiurus	Necromys lasiurus	2	2019	2	3	21	Boqueron	3	Rodentia	Cricetidae	Sigmodontinae	D
206449	2019-06-12	0	0	0	Necromys	lasiurus	Necromys lasiurus	3	2019	1	2	28	Boqueron	3	Rodentia	Cricetidae	Sigmodontinae	D
206450	2019-06-12	0	0	0	Necromys	lasiurus	Necromys lasiurus	3	2019	2	3	24	Boqueron	3	Rodentia	Cricetidae	Sigmodontinae	D
206451	2019-06-12	0	0	0	Oligoryzomys	chacoensis	Oligoryzomys chacoensis	2	2019	2	3	14	Boqueron	3	Rodentia	Cricetidae	Sigmodontinae	E
206452	2019-06-12	0	0	0	Necromys	lasiurus	Necromys lasiurus	3	2019	1	1	51	Boqueron	3	Rodentia	Cricetidae	Sigmodontinae	F
206453	2019-06-12	0	0	0	Necromys	lasiurus	Necromys lasiurus	2	2019	1	2	20	Boqueron	3	Rodentia	Cricetidae	Sigmodontinae	D
206454	2019-06-12	0	0	0	Pseudoryzomys	simplex	Pseudoryzomys simplex	3	2019	2	3	42	Boqueron	3	Rodentia	Cricetidae	Sigmodontinae	D
206455	2019-06-12	0	0	0	Calomys	laucha	Calomys laucha	3	2019	1	1	9	Boqueron	3	Rodentia	Cricetidae	Sigmodontinae	B
206456	2019-06-12	0	0	0	Oligoryzomys	chacoensis	Oligoryzomys chacoensis	3	2019	1	1	20	Boqueron	3	Rodentia	Cricetidae	Sigmodontinae	C
206457	2019-06-12	0	0	0	Necromys	lasiurus	Necromys lasiurus	3	2019	2	6	32	Boqueron	3	Rodentia	Cricetidae	Sigmodontinae	F
206458	2019-06-12	0	0	0	Necromys	lasiurus	Necromys lasiurus	3	2019	2	3	31	Boqueron	3	Rodentia	Cricetidae	Sigmodontinae	C
206459	2019-06-12	0	0	0	Necromys	lasiurus	Necromys lasiurus	3	2019	1	1	49	Boqueron	3	Rodentia	Cricetidae	Sigmodontinae	F
206460	2019-06-12	0	0	0	Necromys	lasiurus	Necromys lasiurus	3	2019	2	6	48	Boqueron	3	Rodentia	Cricetidae	Sigmodontinae	F
206461	2019-06-12	1	0	1	Necromys	lasiurus	Necromys lasiurus	2	2019	1	2	23	Boqueron	3	Rodentia	Cricetidae	Sigmodontinae	F
206462	2019-06-12	0	0	0	Calomys	laucha	Calomys laucha	2	2019	2	3	7	Boqueron	3	Rodentia	Cricetidae	Sigmodontinae	C
206463	2019-06-12	0	0	0	Akodon	toba	Akodon toba	2	2019	1	2	17	Boqueron	3	Rodentia	Cricetidae	Sigmodontinae	C
206464	2019-06-12	0	0	0	Calomys	laucha	Calomys laucha	3	2019	2	3	13	Boqueron	3	Rodentia	Cricetidae	Sigmodontinae	C
206465	2019-06-12	0	0	0	Necromys	lasiurus	Necromys lasiurus	3	2019	2	6	41	Boqueron	3	Rodentia	Cricetidae	Sigmodontinae	F
206466	2019-06-12	0	0	0	Necromys	lasiurus	Necromys lasiurus	2	2019	2	3	14	Boqueron	3	Rodentia	Cricetidae	Sigmodontinae	C
206467	2019-06-12	0	0	0	Akodon	toba	Akodon toba	3	2019	1	1	44	Boqueron	3	Rodentia	Cricetidae	Sigmodontinae	A
206468	2019-06-13	0	0	0	Oligoryzomys	chacoensis	Oligoryzomys chacoensis	3	2019	2	3	20	Boqueron	3	Rodentia	Cricetidae	Sigmodontinae	F
206469	2019-06-13	0	0	0	Akodon	toba	Akodon toba	2	2019	2	3	23	Boqueron	3	Rodentia	Cricetidae	Sigmodontinae	C
206470	2019-06-13	0	0	0	Necromys	lasiurus	Necromys lasiurus	3	2019	1	2	38	Boqueron	3	Rodentia	Cricetidae	Sigmodontinae	F
206471	2019-06-13	0	0	0	Necromys	lasiurus	Necromys lasiurus	2	2019	1	2	18	Boqueron	3	Rodentia	Cricetidae	Sigmodontinae	D
206472	2019-06-13	0	0	0	Necromys	lasiurus	Necromys lasiurus	3	2019	2	6	46	Boqueron	3	Rodentia	Cricetidae	Sigmodontinae	D
206473	2019-06-13	0	0	0	Holochilus	chacarius	Holochilus chacarius	3	2019	2	3	88	Boqueron	3	Rodentia	Cricetidae	Sigmodontinae	F
206474	2019-06-13	0	0	0	Calomys	laucha	Calomys laucha	2	2019	1	2	8	Boqueron	3	Rodentia	Cricetidae	Sigmodontinae	F
206475	2019-06-13	0	0	0	Holochilus	chacarius	Holochilus chacarius	3	2019	2	3	83	Boqueron	3	Rodentia	Cricetidae	Sigmodontinae	F
206476	2019-06-13	0	0	0	Necromys	lasiurus	Necromys lasiurus	2	2019	1	2	23	Boqueron	3	Rodentia	Cricetidae	Sigmodontinae	F
206477	2019-06-13	0	0	0	Necromys	lasiurus	Necromys lasiurus	3	2019	2	3	33	Boqueron	3	Rodentia	Cricetidae	Sigmodontinae	F
206478	2019-06-13	0	0	0	Necromys	lasiurus	Necromys lasiurus	3	2019	2	3	29	Boqueron	3	Rodentia	Cricetidae	Sigmodontinae	F
206479	2019-06-13	0	0	0	Necromys	lasiurus	Necromys lasiurus	2	2019	1	2	21	Boqueron	3	Rodentia	Cricetidae	Sigmodontinae	F
206480	2019-06-13	0	0	0	Thylamys	pusillus	Thylamys pusillus	2	2019	2	3	10	Boqueron	3	Didelphimorphia	Didelphidae	Didelphinae	D
206481	2019-06-13	0	0	0	Calomys	laucha	Calomys laucha	3	2019	1	2	13	Boqueron	3	Rodentia	Cricetidae	Sigmodontinae	E
206482	2019-06-13	0	0	0	Necromys	lasiurus	Necromys lasiurus	3	2019	1	2	28	Boqueron	3	Rodentia	Cricetidae	Sigmodontinae	E
206483	2019-06-13	0	0	0	Necromys	lasiurus	Necromys lasiurus	3	2019	1	1	49	Boqueron	3	Rodentia	Cricetidae	Sigmodontinae	E
206484	2019-06-13	0	0	0	Necromys	lasiurus	Necromys lasiurus	3	2019	2	3	29	Boqueron	3	Rodentia	Cricetidae	Sigmodontinae	D
206485	2019-06-14	0	0	0	Oligoryzomys	chacoensis	Oligoryzomys chacoensis	3	2019	2	3	23	Boqueron	3	Rodentia	Cricetidae	Sigmodontinae	F
206486	2019-06-14	0	0	0	Necromys	lasiurus	Necromys lasiurus	3	2019	1	1	49	Boqueron	3	Rodentia	Cricetidae	Sigmodontinae	F
206487	2019-06-14	0	0	0	Necromys	lasiurus	Necromys lasiurus	2	2019	2	3	23	Boqueron	3	Rodentia	Cricetidae	Sigmodontinae	F
206488	2019-06-14	0	0	0	Necromys	lasiurus	Necromys lasiurus	2	2019	1	2	13	Boqueron	3	Rodentia	Cricetidae	Sigmodontinae	D
206489	2019-06-14	0	0	0	Necromys	lasiurus	Necromys lasiurus	3	2019	2	6	46	Boqueron	3	Rodentia	Cricetidae	Sigmodontinae	C
206490	2019-06-14	0	0	0	Necromys	lasiurus	Necromys lasiurus	3	2019	1	2	31	Boqueron	3	Rodentia	Cricetidae	Sigmodontinae	D
206491	2019-06-14	0	0	0	Necromys	lasiurus	Necromys lasiurus	3	2019	2	3	36	Boqueron	3	Rodentia	Cricetidae	Sigmodontinae	A
206492	2019-06-14	0	0	0	Necromys	lasiurus	Necromys lasiurus	2	2019	1	2	25	Boqueron	3	Rodentia	Cricetidae	Sigmodontinae	D
206493	2019-06-14	0	0	0	Calomys	laucha	Calomys laucha	2	2019	1	2	9	Boqueron	3	Rodentia	Cricetidae	Sigmodontinae	D
206494	2019-06-14	0	0	0	Calomys	laucha	Calomys laucha	3	2019	1	1	16	Boqueron	3	Rodentia	Cricetidae	Sigmodontinae	C
206495	2019-06-14	0	0	0	Holochilus	chacarius	Holochilus chacarius	2	2019	2	3	69	Boqueron	3	Rodentia	Cricetidae	Sigmodontinae	F
206496	2019-06-14	0	0	0	Necromys	lasiurus	Necromys lasiurus	1	2019	1	2	9	Boqueron	3	Rodentia	Cricetidae	Sigmodontinae	F
206497	2019-06-14	1	0	1	Calomys	laucha	Calomys laucha	3	2019	2	3	16	Boqueron	3	Rodentia	Cricetidae	Sigmodontinae	A
206498	2019-06-14	0	0	0	Oligoryzomys	chacoensis	Oligoryzomys chacoensis	3	2019	2	3	13	Boqueron	3	Rodentia	Cricetidae	Sigmodontinae	E
206499	2019-06-14	0	0	0	Necromys	lasiurus	Necromys lasiurus	3	2019	1	2	28	Boqueron	3	Rodentia	Cricetidae	Sigmodontinae	E
206500	2019-06-14	0	0	0	Necromys	lasiurus	Necromys lasiurus	3	2019	2	3	39	Boqueron	3	Rodentia	Cricetidae	Sigmodontinae	B
206501	2019-06-14	0	0	0	Calomys	laucha	Calomys laucha	2	2019	1	2	9	Boqueron	3	Rodentia	Cricetidae	Sigmodontinae	E
206502	2019-06-14	0	0	0	Necromys	lasiurus	Necromys lasiurus	1	2019	2	3	12	Boqueron	3	Rodentia	Cricetidae	Sigmodontinae	E
206503	2019-06-14	0	0	0	Calomys	laucha	Calomys laucha	2	2019	1	2	7	Boqueron	3	Rodentia	Cricetidae	Sigmodontinae	F
206504	2019-06-14	0	0	0	Necromys	lasiurus	Necromys lasiurus	3	2019	1	1	30	Boqueron	3	Rodentia	Cricetidae	Sigmodontinae	D
206505	2019-06-14	0	0	0	Necromys	lasiurus	Necromys lasiurus	3	2019	1	1	40	Boqueron	3	Rodentia	Cricetidae	Sigmodontinae	F
206506	2019-06-14	0	0	0	Necromys	lasiurus	Necromys lasiurus	3	2019	2	3	33	Boqueron	3	Rodentia	Cricetidae	Sigmodontinae	E
206507	2019-06-15	0	0	0	Holochilus	chacarius	Holochilus chacarius	3	2019	2	3	76	Boqueron	3	Rodentia	Cricetidae	Sigmodontinae	F
206508	2019-06-15	0	0	0	Holochilus	chacarius	Holochilus chacarius	3	2019	2	3	67	Boqueron	3	Rodentia	Cricetidae	Sigmodontinae	F
206509	2019-06-15	0	0	0	Necromys	lasiurus	Necromys lasiurus	2	2019	2	3	18	Boqueron	3	Rodentia	Cricetidae	Sigmodontinae	F
206510	2019-06-15	0	0	0	Oligoryzomys	mattogrossae	Oligoryzomys mattogrossae	1	2019	2	3	9	Boqueron	3	Rodentia	Cricetidae	Sigmodontinae	F
206511	2019-06-15	0	0	0	Holochilus	chacarius	Holochilus chacarius	3	2019	2	3	88	Boqueron	3	Rodentia	Cricetidae	Sigmodontinae	F
206512	2019-06-15	0	0	0	Necromys	lasiurus	Necromys lasiurus	2	2019	1	2	14	Boqueron	3	Rodentia	Cricetidae	Sigmodontinae	F
206513	2019-06-15	0	0	0	Necromys	lasiurus	Necromys lasiurus	2	2019	2	3	20	Boqueron	3	Rodentia	Cricetidae	Sigmodontinae	F
206514	2019-06-15	0	0	0	Necromys	lasiurus	Necromys lasiurus	2	2019	2	3	10	Boqueron	3	Rodentia	Cricetidae	Sigmodontinae	F
206515	2019-06-15	0	0	0	Necromys	lasiurus	Necromys lasiurus	2	2019	2	3	10	Boqueron	3	Rodentia	Cricetidae	Sigmodontinae	F
206516	2019-06-15	0	0	0	Necromys	lasiurus	Necromys lasiurus	2	2019	2	3	15	Boqueron	3	Rodentia	Cricetidae	Sigmodontinae	E
206517	2019-06-15	0	0	0	Oligoryzomys	chacoensis	Oligoryzomys chacoensis	3	2019	2	3	21	Boqueron	3	Rodentia	Cricetidae	Sigmodontinae	E
206518	2019-06-15	0	0	0	Necromys	lasiurus	Necromys lasiurus	3	2019	2	6	32	Boqueron	3	Rodentia	Cricetidae	Sigmodontinae	E
206519	2019-06-15	0	0	0	Necromys	lasiurus	Necromys lasiurus	3	2019	2	3	29	Boqueron	3	Rodentia	Cricetidae	Sigmodontinae	D
206520	2019-06-15	1	0	1	Necromys	lasiurus	Necromys lasiurus	3	2019	2	5	31	Boqueron	3	Rodentia	Cricetidae	Sigmodontinae	D
206521	2019-06-15	0	0	0	Calomys	laucha	Calomys laucha	3	2019	1	1	10	Boqueron	3	Rodentia	Cricetidae	Sigmodontinae	D
206522	2019-06-15	0	0	0	Calomys	laucha	Calomys laucha	2	2019	2	3	8	Boqueron	3	Rodentia	Cricetidae	Sigmodontinae	D
206523	2019-06-15	1	0	1	Calomys	laucha	Calomys laucha	2	2019	1	2	9	Boqueron	3	Rodentia	Cricetidae	Sigmodontinae	D
206524	2019-06-15	0	0	0	Holochilus	chacarius	Holochilus chacarius	3	2019	2	3	60	Boqueron	3	Rodentia	Cricetidae	Sigmodontinae	C
206525	2019-06-15	0	0	0	Calomys	laucha	Calomys laucha	3	2019	1	1	9	Boqueron	3	Rodentia	Cricetidae	Sigmodontinae	C
206526	2019-06-15	0	0	0	Necromys	lasiurus	Necromys lasiurus	3	2019	2	3	22	Boqueron	3	Rodentia	Cricetidae	Sigmodontinae	C
206527	2019-06-15	0	0	0	Necromys	lasiurus	Necromys lasiurus	3	2019	1	2	26	Boqueron	3	Rodentia	Cricetidae	Sigmodontinae	A
206528	2019-06-16	0	0	0	Calomys	laucha	Calomys laucha	3	2019	1	1	10	Boqueron	3	Rodentia	Cricetidae	Sigmodontinae	C
206529	2019-06-16	0	0	0	Thylamys	pusillus	Thylamys pusillus	3	2019	2	3	19	Boqueron	3	Didelphimorphia	Didelphidae	Didelphinae	C
206530	2019-06-16	0	0	0	Necromys	lasiurus	Necromys lasiurus	2	2019	2	3	15	Boqueron	3	Rodentia	Cricetidae	Sigmodontinae	C
206531	2019-06-16	0	0	0	Akodon	toba	Akodon toba	3	2019	2	6	41	Boqueron	3	Rodentia	Cricetidae	Sigmodontinae	C
206532	2019-06-16	0	0	0	Akodon	toba	Akodon toba	3	2019	1	1	39	Boqueron	3	Rodentia	Cricetidae	Sigmodontinae	C
206533	2019-06-16	0	0	0	Thylamys	pusillus	Thylamys pusillus	3	2019	1	1	16	Boqueron	3	Didelphimorphia	Didelphidae	Didelphinae	B
206534	2019-06-16	0	0	0	Necromys	lasiurus	Necromys lasiurus	3	2019	2	5	47	Boqueron	3	Rodentia	Cricetidae	Sigmodontinae	B
206535	2019-06-16	0	0	0	Oligoryzomys	chacoensis	Oligoryzomys chacoensis	3	2019	1	2	11	Boqueron	3	Rodentia	Cricetidae	Sigmodontinae	B
206536	2019-06-16	0	0	0	Necromys	lasiurus	Necromys lasiurus	3	2019	2	3	24	Boqueron	3	Rodentia	Cricetidae	Sigmodontinae	C
206537	2019-06-16	0	0	0	Calomys	callosus	Calomys callosus	3	2019	1	2	19	Boqueron	3	Rodentia	Cricetidae	Sigmodontinae	C
206538	2019-06-16	0	0	0	Calomys	laucha	Calomys laucha	3	2019	1	2	11	Boqueron	3	Rodentia	Cricetidae	Sigmodontinae	B
206539	2019-06-16	0	0	0	Akodon	toba	Akodon toba	3	2019	1	2	28	Boqueron	3	Rodentia	Cricetidae	Sigmodontinae	A
206540	2019-06-16	0	0	0	Calomys	callosus	Calomys callosus	2	2019	1	2	10	Boqueron	3	Rodentia	Cricetidae	Sigmodontinae	B
206541	2019-06-16	0	0	0	Necromys	lasiurus	Necromys lasiurus	2	2019	2	3	16	Boqueron	3	Rodentia	Cricetidae	Sigmodontinae	A
206542	2019-06-16	0	0	0	Necromys	lasiurus	Necromys lasiurus	3	2019	1	1	35	Boqueron	3	Rodentia	Cricetidae	Sigmodontinae	B
206543	2019-06-16	0	0	0	Necromys	lasiurus	Necromys lasiurus	2	2019	2	3	18	Boqueron	3	Rodentia	Cricetidae	Sigmodontinae	A
206544	2019-06-16	0	0	0	Calomys	laucha	Calomys laucha	3	2019	1	2	10	Boqueron	3	Rodentia	Cricetidae	Sigmodontinae	B
206545	2019-06-16	0	0	0	Oligoryzomys	chacoensis	Oligoryzomys chacoensis	3	2019	1	1	20	Boqueron	3	Rodentia	Cricetidae	Sigmodontinae	B
206546	2019-06-16	0	0	0	Akodon	toba	Akodon toba	3	2019	2	4	37	Boqueron	3	Rodentia	Cricetidae	Sigmodontinae	B
206547	2019-06-16	0	0	0	Calomys	laucha	Calomys laucha	3	2019	1	1	11	Boqueron	3	Rodentia	Cricetidae	Sigmodontinae	A
206548	2019-06-16	0	0	0	Akodon	toba	Akodon toba	3	2019	2	6	39	Boqueron	3	Rodentia	Cricetidae	Sigmodontinae	B
206549	2019-06-16	0	0	0	Akodon	toba	Akodon toba	3	2019	1	1	53	Boqueron	3	Rodentia	Cricetidae	Sigmodontinae	A
206550	2019-06-16	0	0	0	Necromys	lasiurus	Necromys lasiurus	3	2019	2	5	55	Boqueron	3	Rodentia	Cricetidae	Sigmodontinae	B
206551	2019-06-17	0	0	0	Akodon	toba	Akodon toba	3	2019	2	3	22	Boqueron	3	Rodentia	Cricetidae	Sigmodontinae	B
206552	2019-06-17	0	0	0	Oligoryzomys	chacoensis	Oligoryzomys chacoensis	3	2019	1	2	13	Boqueron	3	Rodentia	Cricetidae	Sigmodontinae	B
206553	2019-06-17	0	0	0	Akodon	toba	Akodon toba	3	2019	2	6	41	Boqueron	3	Rodentia	Cricetidae	Sigmodontinae	A
206554	2019-06-17	0	0	0	Calomys	laucha	Calomys laucha	3	2019	1	1	12	Boqueron	3	Rodentia	Cricetidae	Sigmodontinae	B
206555	2019-06-17	0	0	0	Necromys	lasiurus	Necromys lasiurus	3	2019	2	5	45	Boqueron	3	Rodentia	Cricetidae	Sigmodontinae	A
206556	2019-06-17	0	0	0	Necromys	lasiurus	Necromys lasiurus	3	2019	2	5	28	Boqueron	3	Rodentia	Cricetidae	Sigmodontinae	B
206557	2019-06-17	0	0	0	Calomys	callosus	Calomys callosus	3	2019	2	3	18	Boqueron	3	Rodentia	Cricetidae	Sigmodontinae	B
206558	2019-06-17	0	0	0	Akodon	toba	Akodon toba	3	2019	2	6	40	Boqueron	3	Rodentia	Cricetidae	Sigmodontinae	A
206559	2019-06-17	0	0	0	Akodon	toba	Akodon toba	3	2019	2	3	22	Boqueron	3	Rodentia	Cricetidae	Sigmodontinae	A
206560	2019-06-17	0	0	0	Akodon	toba	Akodon toba	3	2019	1	1	42	Boqueron	3	Rodentia	Cricetidae	Sigmodontinae	A
206561	2019-06-17	0	0	0	Akodon	toba	Akodon toba	2	2019	1	2	17	Boqueron	3	Rodentia	Cricetidae	Sigmodontinae	A
206562	2019-06-17	0	0	0	Akodon	toba	Akodon toba	3	2019	1	2	31	Boqueron	3	Rodentia	Cricetidae	Sigmodontinae	A
206563	2019-06-17	0	0	0	Akodon	toba	Akodon toba	3	2019	1	2	23	Boqueron	3	Rodentia	Cricetidae	Sigmodontinae	B
206564	2019-06-17	0	0	0	Oligoryzomys	chacoensis	Oligoryzomys chacoensis	3	2019	1	2	15	Boqueron	3	Rodentia	Cricetidae	Sigmodontinae	A
206565	2019-06-17	0	0	0	Akodon	toba	Akodon toba	3	2019	1	1	41	Boqueron	3	Rodentia	Cricetidae	Sigmodontinae	C
206566	2019-06-17	0	0	0	Calomys	laucha	Calomys laucha	3	2019	1	2	11	Boqueron	3	Rodentia	Cricetidae	Sigmodontinae	B
206567	2019-06-17	0	0	0	Akodon	toba	Akodon toba	3	2019	2	5	48	Boqueron	3	Rodentia	Cricetidae	Sigmodontinae	B
206568	2019-06-17	0	0	0	Akodon	toba	Akodon toba	3	2019	1	1	45	Boqueron	3	Rodentia	Cricetidae	Sigmodontinae	D
206569	2019-06-17	0	0	0	Akodon	toba	Akodon toba	3	2019	1	1	42	Boqueron	3	Rodentia	Cricetidae	Sigmodontinae	D
206570	2019-06-17	0	0	0	Akodon	toba	Akodon toba	3	2019	2	3	32	Boqueron	3	Rodentia	Cricetidae	Sigmodontinae	E
206571	2019-06-17	0	0	0	Akodon	toba	Akodon toba	3	2019	2	6	47	Boqueron	3	Rodentia	Cricetidae	Sigmodontinae	D
206572	2019-06-17	0	0	0	Akodon	toba	Akodon toba	3	2019	1	2	33	Boqueron	3	Rodentia	Cricetidae	Sigmodontinae	E
206573	2019-06-17	0	0	0	Akodon	toba	Akodon toba	3	2019	2	5	40	Boqueron	3	Rodentia	Cricetidae	Sigmodontinae	E
206574	2019-06-17	0	0	0	Calomys	laucha	Calomys laucha	3	2019	2	5	9	Boqueron	3	Rodentia	Cricetidae	Sigmodontinae	B
206575	2019-06-17	0	0	0	Calomys	callosus	Calomys callosus	3	2019	2	5	19	Boqueron	3	Rodentia	Cricetidae	Sigmodontinae	B
206576	2019-06-17	0	0	0	Calomys	laucha	Calomys laucha	3	2019	2	5	12	Boqueron	3	Rodentia	Cricetidae	Sigmodontinae	B
206577	2019-06-17	0	0	0	Akodon	toba	Akodon toba	2	2019	2	3	19	Boqueron	3	Rodentia	Cricetidae	Sigmodontinae	B
206578	2019-06-17	0	0	0	Thylamys	pusillus	Thylamys pusillus	3	2019	2	3	14	Boqueron	3	Didelphimorphia	Didelphidae	Didelphinae	B
206579	2019-06-17	0	0	0	Oligoryzomys	chacoensis	Oligoryzomys chacoensis	3	2019	1	1	15	Boqueron	3	Rodentia	Cricetidae	Sigmodontinae	E
206580	2019-06-17	0	0	0	Oligoryzomys	chacoensis	Oligoryzomys chacoensis	3	2019	1	1	21	Boqueron	3	Rodentia	Cricetidae	Sigmodontinae	E
206581	2019-06-17	0	0	0	Akodon	toba	Akodon toba	3	2019	1	2	26	Boqueron	3	Rodentia	Cricetidae	Sigmodontinae	E
206582	2019-06-17	0	0	0	Akodon	toba	Akodon toba	3	2019	2	5	38	Boqueron	3	Rodentia	Cricetidae	Sigmodontinae	E
206583	2019-06-17	0	0	0	Calomys	laucha	Calomys laucha	3	2019	1	1	12	Boqueron	3	Rodentia	Cricetidae	Sigmodontinae	B
206584	2019-06-17	0	0	0	Akodon	toba	Akodon toba	3	2019	1	1	46	Boqueron	3	Rodentia	Cricetidae	Sigmodontinae	C
206585	2019-06-17	0	0	0	Necromys	lasiurus	Necromys lasiurus	3	2019	1	1	38	Boqueron	3	Rodentia	Cricetidae	Sigmodontinae	C
206586	2019-06-17	0	0	0	Akodon	toba	Akodon toba	2	2019	1	2	15	Boqueron	3	Rodentia	Cricetidae	Sigmodontinae	C
206587	2019-06-17	0	0	0	Akodon	toba	Akodon toba	3	2019	2	3	30	Boqueron	3	Rodentia	Cricetidae	Sigmodontinae	C
206588	2019-06-17	0	0	0	Calomys	laucha	Calomys laucha	3	2019	2	5	13	Boqueron	3	Rodentia	Cricetidae	Sigmodontinae	C
206589	2019-06-17	0	0	0	Akodon	toba	Akodon toba	3	2019	2	6	37	Boqueron	3	Rodentia	Cricetidae	Sigmodontinae	C
206590	2019-06-17	0	0	0	Akodon	toba	Akodon toba	3	2019	2	6	43	Boqueron	3	Rodentia	Cricetidae	Sigmodontinae	C
206591	2019-06-17	0	0	0	Necromys	lasiurus	Necromys lasiurus	2	2019	1	2	15	Boqueron	3	Rodentia	Cricetidae	Sigmodontinae	D
206592	2019-06-17	0	0	0	Akodon	toba	Akodon toba	2	2019	1	2	22	Boqueron	3	Rodentia	Cricetidae	Sigmodontinae	C
206593	2019-06-17	0	0	0	Akodon	toba	Akodon toba	3	2019	2	6	38	Boqueron	3	Rodentia	Cricetidae	Sigmodontinae	C
206594	2019-06-17	0	0	0	Akodon	toba	Akodon toba	3	2019	1	2	36	Boqueron	3	Rodentia	Cricetidae	Sigmodontinae	D
206595	2019-06-18	0	0	0	Oligoryzomys	chacoensis	Oligoryzomys chacoensis	2	2019	1	2	10	Boqueron	3	Rodentia	Cricetidae	Sigmodontinae	E
206596	2019-06-18	0	0	0	Oligoryzomys	chacoensis	Oligoryzomys chacoensis	3	2019	2	3	11	Boqueron	3	Rodentia	Cricetidae	Sigmodontinae	C
206597	2019-06-18	0	0	0	Akodon	toba	Akodon toba	3	2019	1	1	43	Boqueron	3	Rodentia	Cricetidae	Sigmodontinae	D
206598	2019-06-18	0	0	0	Necromys	lasiurus	Necromys lasiurus	3	2019	2	4	23	Boqueron	3	Rodentia	Cricetidae	Sigmodontinae	C
206599	2019-06-18	0	0	0	Necromys	lasiurus	Necromys lasiurus	2	2019	2	3	15	Boqueron	3	Rodentia	Cricetidae	Sigmodontinae	A
206600	2019-06-18	0	0	0	Akodon	toba	Akodon toba	3	2019	1	1	48	Boqueron	3	Rodentia	Cricetidae	Sigmodontinae	E
246151	2019-06-18	0	0	0	Calomys	laucha	Calomys laucha	3	2019	2	4	8	Boqueron	3	Rodentia	Cricetidae	Sigmodontinae	B
246152	2019-06-18	0	0	0	Akodon	toba	Akodon toba	3	2019	1	1	50	Boqueron	3	Rodentia	Cricetidae	Sigmodontinae	B
246153	2019-06-18	0	0	0	Calomys	callosus	Calomys callosus	3	2019	1	1	20	Boqueron	3	Rodentia	Cricetidae	Sigmodontinae	B
246154	2019-06-18	0	0	0	Thylamys	pusillus	Thylamys pusillus	3	2019	1	1	21	Boqueron	3	Didelphimorphia	Didelphidae	Didelphinae	C
246155	2019-06-18	0	0	0	Necromys	lasiurus	Necromys lasiurus	3	2019	2	5	38	Boqueron	3	Rodentia	Cricetidae	Sigmodontinae	B
246156	2019-06-18	0	0	0	Oligoryzomys	chacoensis	Oligoryzomys chacoensis	3	2019	2	3	11	Boqueron	3	Rodentia	Cricetidae	Sigmodontinae	A
246157	2019-06-18	0	0	0	Calomys	laucha	Calomys laucha	3	2019	1	1	14	Boqueron	3	Rodentia	Cricetidae	Sigmodontinae	C
246158	2019-06-18	0	0	0	Akodon	toba	Akodon toba	3	2019	1	1	43	Boqueron	3	Rodentia	Cricetidae	Sigmodontinae	B
246159	2019-06-18	0	0	0	Necromys	lasiurus	Necromys lasiurus	3	2019	2	6	29	Boqueron	3	Rodentia	Cricetidae	Sigmodontinae	C
246160	2019-06-18	0	0	0	Oligoryzomys	chacoensis	Oligoryzomys chacoensis	3	2019	2	6	20	Boqueron	3	Rodentia	Cricetidae	Sigmodontinae	A
246161	2019-06-18	0	0	0	Akodon	toba	Akodon toba	3	2019	1	1	42	Boqueron	3	Rodentia	Cricetidae	Sigmodontinae	C
246162	2019-06-18	0	0	0	Necromys	lasiurus	Necromys lasiurus	3	2019	2	3	32	Boqueron	3	Rodentia	Cricetidae	Sigmodontinae	E
246163	2019-06-18	0	0	0	Akodon	toba	Akodon toba	2	2019	1	2	12	Boqueron	3	Rodentia	Cricetidae	Sigmodontinae	D
246164	2019-06-18	0	0	0	Akodon	toba	Akodon toba	3	2019	1	1	27	Boqueron	3	Rodentia	Cricetidae	Sigmodontinae	D
246165	2019-06-18	1	0	1	Necromys	lasiurus	Necromys lasiurus	3	2019	1	1	39	Boqueron	3	Rodentia	Cricetidae	Sigmodontinae	A
246166	2019-06-18	0	0	0	Necromys	lasiurus	Necromys lasiurus	2	2019	2	3	10	Boqueron	3	Rodentia	Cricetidae	Sigmodontinae	A
246167	2019-06-18	0	0	0	Akodon	toba	Akodon toba	3	2019	2	3	40	Boqueron	3	Rodentia	Cricetidae	Sigmodontinae	A
246168	2019-06-19	0	0	0	Akodon	toba	Akodon toba	3	2019	1	2	26	Boqueron	3	Rodentia	Cricetidae	Sigmodontinae	E
246169	2019-06-19	0	0	0	Akodon	toba	Akodon toba	3	2019	2	5	67	Boqueron	3	Rodentia	Cricetidae	Sigmodontinae	E
246170	2019-06-19	0	0	0	Akodon	toba	Akodon toba	2	2019	2	3	16	Boqueron	3	Rodentia	Cricetidae	Sigmodontinae	E
246171	2019-06-19	0	0	0	Graomys	chacoensis	Graomys chacoensis	3	2019	2	3	66	Boqueron	3	Rodentia	Cricetidae	Sigmodontinae	D
246172	2019-06-19	0	0	0	Graomys	chacoensis	Graomys chacoensis	3	2019	1	1	73	Boqueron	3	Rodentia	Cricetidae	Sigmodontinae	D
246173	2019-06-19	0	0	0	Akodon	toba	Akodon toba	3	2019	1	2	26	Boqueron	3	Rodentia	Cricetidae	Sigmodontinae	E
246174	2019-06-19	0	0	0	Akodon	toba	Akodon toba	3	2019	1	2	42	Boqueron	3	Rodentia	Cricetidae	Sigmodontinae	E
246175	2019-06-19	0	0	0	Akodon	toba	Akodon toba	3	2019	2	5	57	Boqueron	3	Rodentia	Cricetidae	Sigmodontinae	E
246176	2019-06-19	0	0	0	Necromys	lasiurus	Necromys lasiurus	3	2019	2	5	40	Boqueron	3	Rodentia	Cricetidae	Sigmodontinae	A
246177	2019-06-19	0	0	0	Necromys	lasiurus	Necromys lasiurus	3	2019	2	6	33	Boqueron	3	Rodentia	Cricetidae	Sigmodontinae	A
246178	2019-06-19	0	0	0	Akodon	toba	Akodon toba	3	2019	1	1	42	Boqueron	3	Rodentia	Cricetidae	Sigmodontinae	E
246179	2019-06-19	0	0	0	Necromys	lasiurus	Necromys lasiurus	3	2019	1	1	38	Boqueron	3	Rodentia	Cricetidae	Sigmodontinae	A
246180	2019-06-19	1	0	1	Calomys	laucha	Calomys laucha	3	2019	1	1	16	Boqueron	3	Rodentia	Cricetidae	Sigmodontinae	A
246181	2019-06-19	0	0	0	Akodon	toba	Akodon toba	3	2019	1	2	48	Boqueron	3	Rodentia	Cricetidae	Sigmodontinae	A
246182	2019-06-19	0	0	0	Oligoryzomys	chacoensis	Oligoryzomys chacoensis	3	2019	1	2	19	Boqueron	3	Rodentia	Cricetidae	Sigmodontinae	A
246183	2019-06-19	0	0	0	Oligoryzomys	chacoensis	Oligoryzomys chacoensis	3	2019	1	2	19	Boqueron	3	Rodentia	Cricetidae	Sigmodontinae	A
246184	2019-06-19	0	0	0	Akodon	toba	Akodon toba	3	2019	2	3	30	Boqueron	3	Rodentia	Cricetidae	Sigmodontinae	C
246185	2019-06-19	0	0	0	Akodon	toba	Akodon toba	3	2019	2	6	45	Boqueron	3	Rodentia	Cricetidae	Sigmodontinae	C
246186	2019-06-19	0	0	0	Akodon	toba	Akodon toba	2	2019	1	2	16	Boqueron	3	Rodentia	Cricetidae	Sigmodontinae	D
246187	2019-06-19	0	0	0	Thylamys	pusillus	Thylamys pusillus	3	2019	1	1	18	Boqueron	3	Didelphimorphia	Didelphidae	Didelphinae	D
246188	2019-06-19	0	0	0	Akodon	toba	Akodon toba	3	2019	2	5	61	Boqueron	3	Rodentia	Cricetidae	Sigmodontinae	C
246189	2019-06-19	0	0	0	Oligoryzomys	chacoensis	Oligoryzomys chacoensis	3	2019	2	5	22	Boqueron	3	Rodentia	Cricetidae	Sigmodontinae	C
246190	2019-06-19	0	0	0	Calomys	callosus	Calomys callosus	3	2019	2	3	17	Boqueron	3	Rodentia	Cricetidae	Sigmodontinae	A
246191	2019-06-19	0	0	0	Calomys	callosus	Calomys callosus	3	2019	1	1	13	Boqueron	3	Rodentia	Cricetidae	Sigmodontinae	B
246192	2019-06-19	0	0	0	Akodon	toba	Akodon toba	3	2019	1	2	29	Boqueron	3	Rodentia	Cricetidae	Sigmodontinae	C
246193	2019-06-19	0	0	0	Oligoryzomys	chacoensis	Oligoryzomys chacoensis	3	2019	1	1	17	Boqueron	3	Rodentia	Cricetidae	Sigmodontinae	B
246194	2019-06-19	0	0	0	Akodon	toba	Akodon toba	2	2019	1	2	22	Boqueron	3	Rodentia	Cricetidae	Sigmodontinae	B
246195	2019-06-19	0	0	0	Akodon	toba	Akodon toba	3	2019	1	2	49	Boqueron	3	Rodentia	Cricetidae	Sigmodontinae	A
246196	2019-06-19	0	0	0	Akodon	toba	Akodon toba	3	2019	2	5	45	Boqueron	3	Rodentia	Cricetidae	Sigmodontinae	A
246197	2019-06-19	0	0	0	Akodon	toba	Akodon toba	3	2019	2	4	44	Boqueron	3	Rodentia	Cricetidae	Sigmodontinae	A
246198	2019-06-19	0	0	0	Necromys	lasiurus	Necromys lasiurus	3	2019	1	1	46	Boqueron	3	Rodentia	Cricetidae	Sigmodontinae	B
246199	2019-06-19	0	0	0	Oligoryzomys	chacoensis	Oligoryzomys chacoensis	3	2019	2	4	21	Boqueron	3	Rodentia	Cricetidae	Sigmodontinae	C
246200	2019-06-19	0	0	0	Akodon	toba	Akodon toba	3	2019	2	3	36	Boqueron	3	Rodentia	Cricetidae	Sigmodontinae	A
246201	2019-06-19	0	0	0	Oligoryzomys	chacoensis	Oligoryzomys chacoensis	3	2019	2	6	23	Boqueron	3	Rodentia	Cricetidae	Sigmodontinae	A
246202	2019-06-19	0	0	0	Akodon	toba	Akodon toba	2	2019	2	3	14	Boqueron	3	Rodentia	Cricetidae	Sigmodontinae	A
246203	2019-06-19	0	0	0	Necromys	lasiurus	Necromys lasiurus	3	2019	2	5	51	Boqueron	3	Rodentia	Cricetidae	Sigmodontinae	B
246204	2019-06-19	0	0	0	Necromys	lasiurus	Necromys lasiurus	3	2019	2	6	37	Boqueron	3	Rodentia	Cricetidae	Sigmodontinae	C
246205	2019-06-19	0	0	0	Akodon	toba	Akodon toba	3	2019	2	6	38	Boqueron	3	Rodentia	Cricetidae	Sigmodontinae	C
246206	2019-06-19	0	0	0	Akodon	toba	Akodon toba	3	2019	2	6	35	Boqueron	3	Rodentia	Cricetidae	Sigmodontinae	C
246207	2019-06-19	0	0	0	Akodon	toba	Akodon toba	3	2019	1	2	36	Boqueron	3	Rodentia	Cricetidae	Sigmodontinae	C
246208	2019-06-19	0	0	0	Akodon	toba	Akodon toba	2	2019	2	3	22	Boqueron	3	Rodentia	Cricetidae	Sigmodontinae	C
246209	2019-06-19	0	0	0	Akodon	toba	Akodon toba	3	2019	1	1	45	Boqueron	3	Rodentia	Cricetidae	Sigmodontinae	C
246210	2019-06-19	0	0	0	Oligoryzomys	chacoensis	Oligoryzomys chacoensis	3	2019	1	2	18	Boqueron	3	Rodentia	Cricetidae	Sigmodontinae	A
246211	2019-06-19	0	0	0	Akodon	toba	Akodon toba	3	2019	2	3	31	Boqueron	3	Rodentia	Cricetidae	Sigmodontinae	B
246212	2019-06-19	0	0	0	Necromys	lasiurus	Necromys lasiurus	3	2019	1	2	48	Boqueron	3	Rodentia	Cricetidae	Sigmodontinae	A
246213	2019-06-19	0	0	0	Akodon	toba	Akodon toba	3	2019	2	4	39	Boqueron	3	Rodentia	Cricetidae	Sigmodontinae	E
246214	2019-06-19	0	0	0	Necromys	lasiurus	Necromys lasiurus	3	2019	2	3	31	Boqueron	3	Rodentia	Cricetidae	Sigmodontinae	C
246215	2019-06-19	0	0	0	Oligoryzomys	chacoensis	Oligoryzomys chacoensis	3	2019	2	4	20	Boqueron	3	Rodentia	Cricetidae	Sigmodontinae	E
246216	2019-06-19	0	0	0	Akodon	toba	Akodon toba	3	2019	2	3	29	Boqueron	3	Rodentia	Cricetidae	Sigmodontinae	A
246217	2019-06-19	0	0	0	Necromys	lasiurus	Necromys lasiurus	1	2019	1	2	10	Boqueron	3	Rodentia	Cricetidae	Sigmodontinae	B
246218	2019-06-19	0	0	0	Necromys	lasiurus	Necromys lasiurus	3	2019	2	3	26	Boqueron	3	Rodentia	Cricetidae	Sigmodontinae	B
246219	2019-06-20	0	0	0	Calomys	callosus	Calomys callosus	2	2019	1	2	13	Boqueron	3	Rodentia	Cricetidae	Sigmodontinae	C
246220	2019-06-20	0	0	0	Calomys	laucha	Calomys laucha	3	2019	2	6	14	Boqueron	3	Rodentia	Cricetidae	Sigmodontinae	A
246221	2019-06-20	0	0	0	Oligoryzomys	chacoensis	Oligoryzomys chacoensis	3	2019	2	5	18	Boqueron	3	Rodentia	Cricetidae	Sigmodontinae	C
246222	2019-06-20	0	0	0	Akodon	toba	Akodon toba	2	2019	2	3	20	Boqueron	3	Rodentia	Cricetidae	Sigmodontinae	A
246223	2019-06-20	0	0	0	Akodon	toba	Akodon toba	2	2019	2	3	20	Boqueron	3	Rodentia	Cricetidae	Sigmodontinae	A
246224	2019-06-20	0	0	0	Oligoryzomys	chacoensis	Oligoryzomys chacoensis	3	2019	2	6	19	Boqueron	3	Rodentia	Cricetidae	Sigmodontinae	A
246225	2019-06-20	0	0	0	Akodon	toba	Akodon toba	3	2019	1	1	32	Boqueron	3	Rodentia	Cricetidae	Sigmodontinae	A
246226	2019-06-20	0	0	0	Necromys	lasiurus	Necromys lasiurus	3	2019	2	6	37	Boqueron	3	Rodentia	Cricetidae	Sigmodontinae	A
246227	2019-06-20	0	0	0	Necromys	lasiurus	Necromys lasiurus	3	2019	1	1	37	Boqueron	3	Rodentia	Cricetidae	Sigmodontinae	C
246228	2019-06-20	0	0	0	Akodon	toba	Akodon toba	3	2019	1	1	41	Boqueron	3	Rodentia	Cricetidae	Sigmodontinae	C
246229	2019-06-20	0	0	0	Thylamys	pusillus	Thylamys pusillus	3	2019	1	1	20	Boqueron	3	Didelphimorphia	Didelphidae	Didelphinae	D
246230	2019-06-20	0	0	0	Akodon	toba	Akodon toba	3	2019	1	2	32	Boqueron	3	Rodentia	Cricetidae	Sigmodontinae	D
246231	2019-06-20	0	0	0	Necromys	lasiurus	Necromys lasiurus	2	2019	2	3	16	Boqueron	3	Rodentia	Cricetidae	Sigmodontinae	A
246232	2019-06-20	0	0	0	Thylamys	pusillus	Thylamys pusillus	2	2019	1	1	9	Boqueron	3	Didelphimorphia	Didelphidae	Didelphinae	E
246233	2019-06-20	0	0	0	Oligoryzomys	chacoensis	Oligoryzomys chacoensis	3	2019	1	1	20	Boqueron	3	Rodentia	Cricetidae	Sigmodontinae	D
246234	2019-06-20	0	0	0	Akodon	toba	Akodon toba	3	2019	2	5	37	Boqueron	3	Rodentia	Cricetidae	Sigmodontinae	E
246235	2019-06-20	0	0	0	Graomys	chacoensis	Graomys chacoensis	3	2019	1	1	68	Boqueron	3	Rodentia	Cricetidae	Sigmodontinae	C
246236	2019-06-20	0	0	0	Akodon	toba	Akodon toba	3	2019	2	5	47	Boqueron	3	Rodentia	Cricetidae	Sigmodontinae	E
246237	2019-06-20	0	0	0	Calomys	laucha	Calomys laucha	2	2019	1	2	8	Boqueron	3	Rodentia	Cricetidae	Sigmodontinae	C
246238	2019-06-20	0	0	0	Akodon	toba	Akodon toba	3	2019	1	1	24	Boqueron	3	Rodentia	Cricetidae	Sigmodontinae	E
246239	2019-06-20	0	0	0	Akodon	toba	Akodon toba	3	2019	1	1	51	Boqueron	3	Rodentia	Cricetidae	Sigmodontinae	C
246240	2019-06-20	0	0	0	Necromys	lasiurus	Necromys lasiurus	3	2019	1	1	29	Boqueron	3	Rodentia	Cricetidae	Sigmodontinae	D
246241	2019-06-20	0	0	0	Akodon	toba	Akodon toba	3	2019	1	1	43	Boqueron	3	Rodentia	Cricetidae	Sigmodontinae	D
246242	2019-06-20	0	0	0	Necromys	lasiurus	Necromys lasiurus	2	2019	1	2	17	Boqueron	3	Rodentia	Cricetidae	Sigmodontinae	E
246243	2019-06-20	0	0	0	Graomys	chacoensis	Graomys chacoensis	3	2019	2	3	42	Boqueron	3	Rodentia	Cricetidae	Sigmodontinae	D
246244	2019-06-20	0	0	0	Oligoryzomys	chacoensis	Oligoryzomys chacoensis	3	2019	1	2	13	Boqueron	3	Rodentia	Cricetidae	Sigmodontinae	D
246245	2019-06-20	0	0	0	Necromys	lasiurus	Necromys lasiurus	3	2019	2	6	31	Boqueron	3	Rodentia	Cricetidae	Sigmodontinae	E
246246	2019-06-20	0	0	0	Necromys	lasiurus	Necromys lasiurus	3	2019	2	6	44	Boqueron	3	Rodentia	Cricetidae	Sigmodontinae	C
246247	2019-06-20	0	0	0	Necromys	lasiurus	Necromys lasiurus	3	2019	2	4	38	Boqueron	3	Rodentia	Cricetidae	Sigmodontinae	A
246248	2019-06-20	0	0	0	Graomys	chacoensis	Graomys chacoensis	2	2019	1	2	34	Boqueron	3	Rodentia	Cricetidae	Sigmodontinae	B
246249	2019-06-20	0	0	0	Necromys	lasiurus	Necromys lasiurus	3	2019	2	3	35	Boqueron	3	Rodentia	Cricetidae	Sigmodontinae	B
246250	2019-06-20	0	0	0	Calomys	callosus	Calomys callosus	2	2019	1	2	11	Boqueron	3	Rodentia	Cricetidae	Sigmodontinae	A
